# Supplementary material for: Microwave-assisted pincer-ruthenium catalyzed Guerbet reaction for the upgradation of bio-ethanol to bio-butanol
Source: Royal Society of Chemistry journal article supplement (doi:10.1039/d3cy00079f), 2023-01-01
Supplement: d3cy00079f1.pdf [file d3cy00079f1.pdf]

# Microwave Assisted Pincer-Ruthenium Catalyzed Guerbet Reaction for the Upgradation of Bio-Ethanol to Bio-Butanol

Kanu Das,<sup>a</sup> Lakshay Kathuria,<sup>a</sup> Raksh Vir Jasra,<sup>b,c</sup> Sunil Dhole<sup>d</sup> and Akshai Kumar<sup>\*a,b,e</sup>

<sup>a</sup>Department of Chemistry, Indian Institute of Technology Guwahati, Guwahati, Assam - 781039, India

<sup>b</sup>Centre for Nanotechnology, Indian Institute of Technology Guwahati, Guwahati, Assam – 781039, India

<sup>c</sup>Reliance Industries Limited, R&D Center, Vadodara Manufacturing Division, Vadodara, Gujarat – 91346, India

<sup>d</sup>ChemDist Group of Companies,, Bengaluru, Karnataka – 560092, India

<sup>e</sup>Jyoti and Bhupat Mehta School of Health Science & Technology, Indian Institute of Technology Guwahati, Guwahati – 781039, Assam, India.

E-mail: [akshaikumar@iitg.ac.in](mailto:akshaikumar@iitg.ac.in)

## Table of Contents

| entry |                             | page |
|-------|-----------------------------|------|
| 1     | Experimental Section        | 1    |
| 2     | Optimization table and data | 4    |
| 3     | NMR, HRMS and IR data       | 10   |
| 4     | Computational data          | 16   |
| 5     | References                  | 33   |

## 1. Experimental Section

**General Methods and Materials.** All manipulations were carried out under purified Ar using a standard double manifold or a glove box. The solvents such as tetrahydrofuran (THF), hexane and toluene were dried via double distillation over Na/Benzophenone prior to the experiment.<sup>1-2</sup> Ethanol, methanol and isopropanol were dried and distilled under argon according to literature procedure.<sup>1-2</sup> All other compounds including pyridine-2,6-dicarboxylic acid, 4-Hydroxypyridine-2,6-dicarboxylic acid, *o*-phenylenediamine, [RuCl<sub>2</sub>(*p*-cymene)]<sub>2</sub>, Al<sub>2</sub>O<sub>3</sub>, SiO<sub>2</sub>, MgSiO<sub>3</sub>, DMSO-*d*<sub>6</sub> and CDCl<sub>3</sub> were purchased either from MERCK or Sigma-Aldrich and used as such. The complexes **1a-d**, **2a-d**, **4a** and **5a** were prepared according to the literature procedure.<sup>3-6</sup>

**Physical Measurements.** <sup>1</sup>H, <sup>13</sup>C, <sup>31</sup>P NMR were recorded either on Bruker ASCEND 600 operating at 600 MHz for <sup>1</sup>H, 150 MHz for <sup>13</sup>C, 564 MHz for <sup>31</sup>P or on Bruker AVANCE 400 operating at 400 MHz for <sup>1</sup>H, 100 MHz for <sup>13</sup>C, 376 MHz for <sup>31</sup>P. The mass analysis was done using an Agilent Accurate-Mass Q-ToF ESI-MS 6520. Fourier Transform Infrared (FT-IR) were recorded on Perkin Elmer Spectrum Two FT-IR spectrometer at room temperature with the region 400-4000 cm<sup>-1</sup>. All microwave reactions were performed using a CEM Discover microwave system unit (operating at 110 V, microwave irradiation of 2.45 GHz, maximum microwave output of 300 W) in a 10 mL microwave tube. GC analyses (FID detection) were performed on a Agilent 8860-GC instrument fitted with Agilent Front SSL inlet N2 HP-5 the column (30 m length × 0.32 mm ID) using the following method: Agilent 8860-GC Detector, Oven temperature 60-300 °C, Time at starting temp: 0 min, Final time = 10 min, Flow rate (carrier): 1 mL/min (N<sub>2</sub>), Split ration: 250, Inlet temperature: 250 °C, Detector temperature: 300 °C. H<sub>2</sub> gas analysis (TCD detection) was performed on a Agilent 7820-GC instrument fitted with Agilent Front SSZ Inlet N2 HP-PLOT Q column (30 m length × 0.53 mm ID) using the following method: Agilent 7820-GC Detector, Oven temperature 40 °C, Time at starting temp: 0 min, Hold time = 10 min, Flow rate (carrier): 1 mL/min (N<sub>2</sub>), Split ration: 50, Inlet temperature: 40 °C, Detector temperature: 250 °C. The GC samples for the calibration curve calculations and all the analysis of GC samples were performed according to the protocol reported in literature.<sup>5, 7-8</sup> XPS analysis was carried out in ULVAC-PHI measurement in PHI 5000 VersaProb III scanning XPS microprobe.

**Synthesis of 2,6-bis(1H-benzo[d]imidazol-2-yl)pyridin-4-ol (C):** To a two-necked round bottom flask (100 mL) containing 4-Hydroxypyridine-2,6-dicarboxylic acid (0.2 g, 1.09 mmol) and *o*-phenylenediamine (0.236g, 2.18 mmol), orthophosphoric acid (20 mL) was added. The reaction mixture was heated overnight at 150 °C. A bluish green precipitate was obtained to which sodium bicarbonate solution (10 mL) was added. The residue was filtered and washed with water (10 mL). The product was crystallized in methanol to obtain 0.195 g of an off-white solid in 55% yield. <sup>1</sup>H NMR (600 MHz, DMSO-*d*<sub>6</sub>) δ = 13.10 (s, 2H), 7.70-7.64 (m, 4H), 7.43 (d, *J* = 19.7 Hz, 2H), 7.22 (d, *J* = 14.1 Hz, 4H). <sup>13</sup>C NMR (151 MHz, DMSO-*d*<sub>6</sub>) δ 169.74, 166.40, 166.05, 165.21, 150.64, 149.91, 149.23, 148.80, 122.94, 112.49, 111.16, 108.76. HRMS (ESI): *m/z* calculated for [C<sub>19</sub>H<sub>14</sub>N<sub>5</sub>O]<sup>+</sup> Calculated = 328.1198, Found = 328.1187.

**Synthesis of [(*p*-OH<sup>Bim</sup><sub>2</sub>NNN)RuCl](PPh<sub>3</sub>)<sub>2</sub>Cl (4b).** To a two-necked round bottom flask (25 mL) containing 2,6-bis(1H-benzo[d]imidazol-2-yl)pyridin-4-ol (0.093g, 0.28 mmol) and RuCl<sub>2</sub>(PPh<sub>3</sub>)<sub>3</sub> (0.270 g, 0.28 mmol), dry THF (5mL) was added under argon atmosphere. The reaction mixture was then refluxed for 12 h under argon. During the reaction, the color of the reaction mixture changed from brown to light pink. Subsequently, the solvent was evaporated under reduced pressure to obtain a dark green colored gel. The residue was washed with dry diethyl ether (3 x 5 mL) followed by hexane (3 x 5 mL). A green color solid (0.23 g) was

obtained in 79 % yield.  $^1\text{H}$  NMR (600 MHz,  $\text{CDCl}_3$ )  $\delta$  = 7.68 (dd,  $J$  = 12.0, 7.4 Hz, 4H), 7.55 (t,  $J$  = 7.4 Hz, 2H), 7.47 (dt,  $J$  = 8.0, 4.0 Hz, 4H), 7.38 – 6.17 (m, 24H).  $^{31}\text{P}$  NMR (243 MHz,  $\text{CDCl}_3$ )  $\delta$  = 29.81. HRMS (ESI):  $m/z$  calculated for  $[\text{C}_{57}\text{H}_{45}\text{N}_6\text{P}_2\text{ORu}]^+$  Calculated = 993.2205, Found = 993.2131

**Synthesis of (*p*-OH<sup>Bim</sup><sup>2</sup>NNN)RuCl<sub>2</sub>(CO) (5b).** To a two-necked round bottom flask (25 mL) containing 2,6-bis(1H-benzo[d]imidazol-2-yl)pyridin-4-ol (0.05g, 0.15 mmol) and  $[\text{RuCl}_2(p\text{-cymene})]_2$  (0.047g, 0.08 mmol), dry THF (5mL) was added under argon atmosphere. The reaction mixture was then refluxed for 2 h under argon. Subsequently, an atmosphere of CO was introduced and the reaction mixture was further heated for another 10 h. During the reaction, the color of the reaction mixture changed from pink to brown color. Then the solvent was evaporated under reduced pressure to obtain a dark brown colored gel. The residue was washed with dry diethyl ether (3 x 5 mL) followed by hexane (3 x 5 mL). A yellowish brown color solid (0.07g) was obtained in 86 % yield. Low solubility posed challenges in NMR characterization. IR ( $\text{cm}^{-1}$ ):  $\nu$  = 3049, 2068, 1958, 1611, 1450, 1409, 1372, 1257, 1228, 1096, 1022, 866, 800, 734, 619, 543, 449, 422. HRMS (ESI):  $m/z$  calculated for  $[\text{C}_{20}\text{H}_{13}\text{N}_5\text{O}_2\text{ClRu}]^+$  Calculated = 491.9833, Found = 491.9790.

**General procedure for the Guerbet application reaction.** A 10 mL microwave vial was charged with NaOEt (10 mol %) (0.116 g, 1.71 mmol) and **5b** ( 0.0013 g, 2.5  $\mu\text{mol}$  ) inside the glove box. This was followed by addition of dry ethanol (1 mL, 17.12 mmol) and dry toluene (50  $\mu\text{L}$ ) as an internal standard. The reaction mixture was heated at 110 °C under microwave conditions at an operating power of 75 W. At regular intervals about 20  $\mu\text{L}$  of the sample was collected and analyzed by GC. The product was analyzed by GC analysis.

#### General syntehsis procedure for heterogenization.

A 10 mL schlenk flask was charged with solid support ( $\text{Al}_2\text{O}_3$ ,  $\text{SiO}_2$  and  $\text{MgSiO}_3$ ) (300 mg) and the catalyst (15 mg, 5 % wt./wt.) inside the glovebox. Then KOH (4 mg) was introduced followed by addition of dry toluene (5 mL). The reaction mixture was then stirred for two days under argon. The immobilization of the complex onto the solid was confirmed by its coloration and the concomitant decoloration of the solution. The excess solvent was decanted and the solid was washed by toluene (5mL). The solid was then dried under vacuum prior to its use in catalysis.

#### Computational details

The geometries of all the considered complexes were fully optimized using the DFT (PBEPBE)<sup>9</sup> method on the Gaussian-16 program package.<sup>10</sup> The LANL2DZ<sup>11-13</sup> and 6-311G(d,p) basis set with a polarization function were used respectively for the metal (Ru) and non-metal atoms. The empirical dispersion-GD3 was used in all molecular geometry optimization and energy computations. The transition states were located using the synchronous transit-guided quasi-Newton (QST2) Genecp (gen keyword with the effective core potential) was included to define the basis set. Method and basis set was selected on the basis of previous reports on pincer complexes. Frequency calculations characterize the obtained stationary points as minima structures or transition states based on the number of imaginary frequencies. Single point calculations were performed to calculate the relative free energy values at 110 °C.

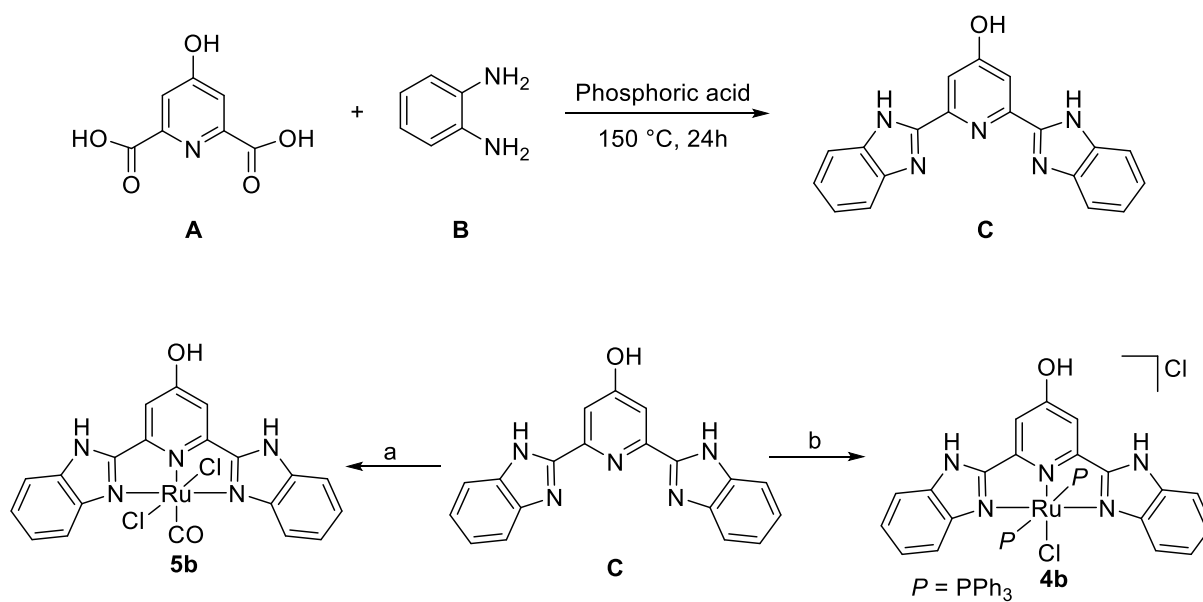

a =  $\text{RuCl}_2(\text{PPh}_3)_3$ , THF at 70 °C, 12h

b =  $[\text{RuCl}_2(\text{p-cymene})]_2$ , at 70 °C for 2h, followed by another 10h under CO (1bar)

**Scheme S1:** Synthesis of ligand and its complexes.

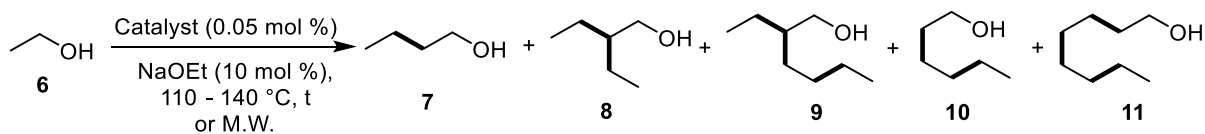

**Scheme S2:** Upgradation of ethanol catalyzed by Pincer-Ru under conventional and microwave heating.

**Table S1:** Upgradation of ethanol catalyzed by **5a** under conventional and microwave heating.<sup>a</sup>

| Entry          | T (°C) | Time (min) | Yield(%) <sup>b</sup> |          |          |           |           | Conversion of <b>6</b> (%) <sup>c</sup> | Selectivity of <b>7</b> (%) <sup>d</sup> | Total TON <sup>e</sup> |
|----------------|--------|------------|-----------------------|----------|----------|-----------|-----------|-----------------------------------------|------------------------------------------|------------------------|
|                |        |            | <b>7</b>              | <b>8</b> | <b>9</b> | <b>10</b> | <b>11</b> |                                         |                                          |                        |
| 1              | 140    | 30         | 8.1                   | 0.2      | 0.0      | 0.1       | 0.0       | 8.4                                     | 98                                       | 336                    |
|                |        | 120        | 25.7                  | 1.5      | 0.7      | 3.9       | 0.8       | 32.6                                    | 78                                       | 1320                   |
|                |        | 4320       | 36.3                  | 3.5      | 2.0      | 8.0       | 2.7       | 52.5                                    | 69                                       | 2100                   |
| 2              | 130    | 30         | 2.7                   | 0.0      | 0.0      | 0.0       | 0.0       | 2.7                                     | 100                                      | 110                    |
|                |        | 120        | 6.5                   | 0.0      | 0.0      | 0.0       | 0.0       | 6.5                                     | 100                                      | 260                    |
|                |        | 4320       | 29.6                  | 5.7      | 0.5      | 4.1       | 0.4       | 40.3                                    | 73                                       | 1614                   |
| 3              | 120    | 30         | 2                     | 0.0      | 0.0      | 0.0       | 0.0       | 2                                       | 100                                      | 80                     |
|                |        | 120        | 6.0                   | 0.0      | 0.0      | 0.0       | 0.0       | 6.0                                     | 100                                      | 240                    |
|                |        | 4320       | 29.6                  | 2.8      | 0.0      | 3.1       | 0.0       | 35.4                                    | 84                                       | 1416                   |
| 4              | 110    | 30         | 0.9                   | 0.0      | 0.0      | 0.0       | 0.0       | 0.9                                     | 100                                      | 37                     |
|                |        | 120        | 3.8                   | 0.0      | 0.0      | 0.0       | 0.0       | 3.8                                     | 100                                      | 152                    |
|                |        | 4320       | 21.7                  | 2.8      | 0.0      | 0.9       | 0.0       | 25.4                                    | 85                                       | 1014                   |
| 5 <sup>f</sup> | 110    | 30         | 10.9                  | 1.4      | 0.0      | 2.1       | 0.0       | 14.4                                    | 79                                       | 580                    |
|                |        | 120        | 27.9                  | 6.0      | 3.1      | 10.2      | 2.8       | 50.0                                    | 56                                       | 2000                   |
| 6 <sup>f</sup> | 100    | 30         | 0.7                   | 0        | 0        | 0         | 0         | 0.7                                     | 100                                      | 30                     |
|                |        | 120        | 2.0                   | 0        | 0        | 0         | 0         | 2.0                                     | 100                                      | 80                     |
| 7 <sup>g</sup> | 110    | 30         | 1.3                   | 0.0      | 0.0      | 0.0       | 0.0       | 1.3                                     | 100                                      | 55                     |
|                |        | 120        | 7.1                   | 0.4      | 0.2      | 0.5       | 0.1       | 8.2                                     | 88                                       | 330                    |
| 8 <sup>h</sup> | 110    | 30         | 6.2                   | 0.7      | 0.0      | 1.4       | 0.0       | 8.4                                     | 75                                       | 335                    |
|                |        | 120        | 19.9                  | 3.2      | 1.5      | 4.6       | 1.2       | 30.4                                    | 67                                       | 1215                   |
| 9 <sup>i</sup> | 110    | 30         | 11.8                  | 0.9      | 0.2      | 1.6       | 0.0       | 14.5                                    | 86                                       | 580                    |
|                |        | 120        | 29.0                  | 3.9      | 1.1      | 5.2       | 1.0       | 40.1                                    | 73                                       | 1600                   |

<sup>a</sup>Reaction condition: ethanol (1 mL, 17.12 mmol), NaOEt (10 mol %) and **5a** (0.025 mol%) at T °C.

<sup>b</sup>Yield was determined by GC analysis using toluene as an internal standard. <sup>c</sup>Conversion was determined by GC analysis using toluene as an internal standard. <sup>d</sup>Selectivity = Yield of *n*-butanol/Conversion. <sup>e</sup>Total TON = Total yield of upgraded products/**5a** loading. <sup>f</sup>Under 75 W microwave. <sup>g</sup>Under 50 W microwave. <sup>h</sup>Under 65 W microwave. <sup>i</sup>Under 90 W microwave.

**Table S2:** Upgradation of ethanol catalyzed by **5a** in the presence of various bases.<sup>a</sup>

| Entry | Base (X mol%)                   | Time (min) | Yield (%) <sup>b</sup> |          |          |           |           | Conversion of <b>6</b> (%) <sup>c</sup> | Selectivity of <b>7</b> (%) <sup>d</sup> | Total TON <sup>e</sup> |
|-------|---------------------------------|------------|------------------------|----------|----------|-----------|-----------|-----------------------------------------|------------------------------------------|------------------------|
|       |                                 |            | <b>7</b>               | <b>8</b> | <b>9</b> | <b>10</b> | <b>11</b> |                                         |                                          |                        |
| 1     | NaOEt                           | 30         | 10.9                   | 1.4      | 0.0      | 2.1       | 0.0       | 14.4                                    | 79                                       | 580                    |
|       | 10.0                            | 120        | 27.9                   | 6.0      | 3.1      | 10.2      | 2.8       | 50.0                                    | 56                                       | 2000                   |
| 2     | NaO <sup>t</sup> Bu             | 30         | 2.0                    | 0.0      | 0.0      | 0.0       | 0.0       | 2.0                                     | 100                                      | 80                     |
|       | 10.0                            | 120        | 9.1                    | 1.9      | 0.9      | 1.7       | 0.8       | 14.4                                    | 71                                       | 580                    |
| 3     | KO <sup>t</sup> Bu              | 30         | 7.9                    | 0.4      | 0.0      | 0.4       | 0.0       | 8.8                                     | 90                                       | 360                    |
|       | 10.0                            | 120        | 34.5                   | 3.9      | 1.1      | 6.5       | 0.2       | 46.1                                    | 74                                       | 1845                   |
| 4     | NEt <sub>3</sub>                | 30         | 0.0                    | 0.0      | 0.0      | 0.0       | 0.0       | 0.0                                     | --                                       | --                     |
|       | 10.0                            | 120        | 0.0                    | 0.0      | 0.0      | 0.0       | 0.0       | 0.0                                     | --                                       | --                     |
| 5     | Na <sub>2</sub> CO <sub>3</sub> | 30         | 0.0                    | 0.0      | 0.0      | 0.0       | 0.0       | 0.0                                     | --                                       | --                     |
|       | 10.0                            | 120        | 0.0                    | 0.0      | 0.0      | 0.0       | 0.0       | 0.0                                     | --                                       | --                     |
| 6     | K <sub>2</sub> CO <sub>3</sub>  | 30         | 0.4                    | 0.0      | 0.0      | 0.0       | 0.0       | 0.4                                     | 100                                      | 20                     |
|       | 10.0                            | 120        | 4.0                    | 0.0      | 0.0      | 0.0       | 0.0       | 4.0                                     | 100                                      | 160                    |
| 7     | NaOH                            | 30         | 9.8                    | 0.8      | 0.1      | 2.2       | 0.0       | 12.9                                    | 77                                       | 520                    |
|       | 10.0                            | 120        | 21.8                   | 2.2      | 0.5      | 4.2       | 0.3       | 29.1                                    | 76                                       | 1160                   |
| 8     | KOH                             | 30         | 11.6                   | 0.0      | 0.0      | 0.0       | 0.0       | 11.6                                    | 100                                      | 480                    |
|       | 10.0                            | 120        | 18.1                   | 1.0      | 0.0      | 1.4       | 0.0       | 20.5                                    | 90                                       | 800                    |
| 9     | NaOEt                           | 30         | 5.2                    | 0.0      | 0.0      | 0.1       | 0.0       | 5.4                                     | 100                                      | 215                    |
|       | 2.5                             | 120        | 19.5                   | 1.1      | 0.1      | 2.3       | 0.4       | 23.3                                    | 83                                       | 930                    |
| 10    | NaOEt                           | 30         | 2.1                    | 0.0      | 0.0      | 0.0       | 0.0       | 2.1                                     | 100                                      | 80                     |
|       | 5.0                             | 120        | 20.3                   | 1.2      | 0.1      | 2.3       | 0.4       | 24.3                                    | 83                                       | 970                    |
| 11    | NaOEt                           | 30         | 4.4                    | 0.2      | 0.0      | 0.6       | 0.0       | 5.3                                     | 80                                       | 210                    |
|       | 7.5                             | 120        | 29.0                   | 2.1      | 0.8      | 3.8       | 0.7       | 36.4                                    | 81                                       | 1455                   |
| 12    | NaOEt                           | 30         | 2.4                    | 0.3      | 0.0      | 0.3       | 0.0       | 2.9                                     | 67                                       | 120                    |
|       | 20                              | 120        | 8.1                    | 0.5      | 0.2      | 0.7       | 0.0       | 9.5                                     | 89                                       | 380                    |

<sup>a</sup>Reaction condition: ethanol (1 mL, 17.12 mmol), base (X mol %) and **5a** (0.025 mol%) at 110 °C under 75 W microwave. <sup>b</sup>Yield was determined by GC analysis using toluene as an internal standard. <sup>c</sup>Conversion was determined by GC analysis using toluene as an internal standard. <sup>d</sup>Selectivity = Yield of *n*-butanol/Conversion. <sup>e</sup>Total TON = Total yield of upgraded products/**5a** loading.

**Table S3:** Upgradation of ethanol at various loading of **5a**.<sup>a</sup>

| Entry | <b>5a</b><br>(Y<br>mol %) | Time<br>(min) | Yield (%) <sup>b</sup> |          |          |           |           | Conversion<br>of <b>6</b> (%) <sup>c</sup> | Selectivity<br>of <b>7</b> (%) <sup>d</sup> | Total<br>TON <sup>e</sup> |
|-------|---------------------------|---------------|------------------------|----------|----------|-----------|-----------|--------------------------------------------|---------------------------------------------|---------------------------|
|       |                           |               | <b>7</b>               | <b>8</b> | <b>9</b> | <b>10</b> | <b>11</b> |                                            |                                             |                           |
| 1     | 0.025                     | 30            | 10.9                   | 1.4      | 0.0      | 2.1       | 0.0       | 14.4                                       | 79                                          | 580                       |
|       |                           | 120           | 27.9                   | 6.0      | 3.1      | 10.2      | 2.8       | 50.0                                       | 56                                          | 2000                      |
| 2     | 0.050                     | 30            | 13.8                   | 0.7      | 0.1      | 1.5       | 0.0       | 16.1                                       | 88                                          | 320                       |
|       |                           | 120           | 34.4                   | 4.9      | 3.1      | 6.3       | 2.3       | 51.0                                       | 67                                          | 1020                      |
| 3     | 0.075                     | 30            | 14.9                   | 1.0      | 0.2      | 0.7       | 0.1       | 16.9                                       | 88                                          | 230                       |
|       |                           | 120           | 40.4                   | 5.7      | 2.4      | 10.2      | 2.4       | 61.0                                       | 66                                          | 815                       |
| 4     | 0.100                     | 30            | 12.6                   | 0.9      | 0.0      | 1.3       | 0.0       | 14.8                                       | 87                                          | 150                       |
|       |                           | 120           | 41.1                   | 10.2     | 2.5      | 12.8      | 2.1       | 68.7                                       | 59                                          | 690                       |
| 5     | 0.500                     | 30            | 15.2                   | 1.2      | 0.2      | 1.1       | 0.0       | 17.7                                       | 86                                          | 35                        |
|       |                           | 120           | 41.3                   | 9.2      | 5.1      | 10.6      | 4.6       | 70.7                                       | 57                                          | 142                       |
| 6     | 1.000                     | 30            | 18.2                   | 1.2      | 0.3      | 1.0       | 0.2       | 20.9                                       | 87                                          | 21                        |
|       |                           | 120           | 42.0                   | 10.1     | 3.7      | 10.8      | 5.2       | 71.8                                       | 57                                          | 72                        |

<sup>a</sup>Reaction condition: ethanol (1 mL, 17.12 mmol), NaOEt (10 mol %) and **5a** (Y mol %) at 110 °C under 75 W microwave. <sup>b</sup>Yield was determined by GC analysis using toluene as an internal standard. <sup>c</sup>Conversion was determined by GC analysis using toluene as an internal standard. <sup>d</sup>Selectivity = Yield of *n*-butanol/Conversion. <sup>e</sup>Total TON = Total yield of upgraded products/**5a** loading.

**Table S4:** Pincer-ruthenium catalyzed ethanol upgradation.<sup>a</sup>

| Entry | Catalyst  | Time (min) | Yield of <b>7</b> (%) <sup>b</sup> |          |          |           |           | Conversion of <b>6</b> (%) <sup>c</sup> | Selectivity of <b>7</b> (%) <sup>d</sup> | Total TON <sup>e</sup> |
|-------|-----------|------------|------------------------------------|----------|----------|-----------|-----------|-----------------------------------------|------------------------------------------|------------------------|
|       |           |            | <b>7</b>                           | <b>8</b> | <b>9</b> | <b>10</b> | <b>11</b> |                                         |                                          |                        |
| 1     | <b>2a</b> | 30         | 3.8                                | 0.0      | 0.0      | 0.0       | 0.0       | 3.8                                     | 100                                      | 160                    |
|       |           | 120        | 4.4                                | 0.0      | 0.0      | 0.0       | 0.0       | 4.4                                     | 100                                      | 180                    |
| 2     | <b>2b</b> | 30         | 3.1                                | 0.0      | 0.0      | 0.0       | 0.0       | 3.1                                     | 100                                      | 120                    |
|       |           | 120        | 5.8                                | 0.0      | 0.0      | 0.0       | 0.0       | 5.8                                     | 100                                      | 230                    |
| 3     | <b>2c</b> | 30         | 2.7                                | 0.0      | 0.0      | 0.0       | 0.0       | 2.7                                     | 100                                      | 105                    |
|       |           | 120        | 4.4                                | 0.0      | 0.0      | 0.0       | 0.0       | 4.4                                     | 100                                      | 180                    |
| 4     | <b>2d</b> | 30         | 1.8                                | 0.1      | 0.0      | 0.1       | 0.0       | 2.0                                     | 100                                      | 80                     |
|       |           | 120        | 4.7                                | 0.9      | 0.0      | 0.7       | 0.0       | 6.3                                     | 83                                       | 250                    |
| 5     | <b>5a</b> | 30         | 10.9                               | 1.4      | 0.0      | 2.1       | 0.0       | 14.4                                    | 79                                       | 580                    |
|       |           | 120        | 27.9                               | 6.0      | 3.1      | 10.2      | 2.8       | 50.0                                    | 56                                       | 2000                   |
| 6     | <b>5b</b> | 30         | 7.7                                | 0.0      | 0.0      | 0.0       | 0.0       | 7.7                                     | 100                                      | 310                    |
|       |           | 120        | 45.0                               | 5.0      | 0.2      | 9.7       | 1.7       | 61.5                                    | 74                                       | 2440                   |
| 7     | <b>1a</b> | 30         | 3.1                                | 0.0      | 0.0      | 0.0       | 0.0       | 3.1                                     | 100                                      | 125                    |
|       |           | 120        | 5.1                                | 0.0      | 0.0      | 0.0       | 0.0       | 5.1                                     | 100                                      | 205                    |
| 8     | <b>1b</b> | 30         | 5.0                                | 0.0      | 0.0      | 0.0       | 0.0       | 5.0                                     | 100                                      | 205                    |
|       |           | 120        | 9.6                                | 1.5      | 0.0      | 1.1       | 0.0       | 12.2                                    | 83                                       | 490                    |
| 9     | <b>1c</b> | 30         | 4.7                                | 0.0      | 0.0      | 0.0       | 0.0       | 4.7                                     | 100                                      | 190                    |
|       |           | 120        | 6.2                                | 0.0      | 0.0      | 0.0       | 0.0       | 6.2                                     | 100                                      | 250                    |
| 10    | <b>1d</b> | 30         | 2.3                                | 0.0      | 0.0      | 0.0       | 0.0       | 2.3                                     | 100                                      | 90                     |
|       |           | 120        | 4.0                                | 0.0      | 0.0      | 0.0       | 0.0       | 4.0                                     | 100                                      | 160                    |
| 11    | <b>4a</b> | 30         | 7.7                                | 0.7      | 0.0      | 0.9       | 0.0       | 9.4                                     | 89                                       | 375                    |
|       |           | 120        | 27.0                               | 2.4      | 0.9      | 5.0       | 0.5       | 35.8                                    | 75                                       | 1430                   |
| 12    | <b>4b</b> | 30         | 7                                  | 1        | 0.0      | 1         | 0.0       | 9                                       | 78                                       | 380                    |
|       |           | 120        | 27.1                               | 1.3      | 0.3      | 2.5       | 0.1       | 31.4                                    | 87                                       | 1255                   |

<sup>a</sup>Reaction condition: ethanol (1 mL, 17.12 mmol), NaOEt (10 mol %) **1a-d**, **2a-d**, **4a-b** and **5a-b** (0.025 mol %) at 110 °C under 75 W microwave. <sup>b</sup>Yield was determined by GC analysis using toluene as an internal standard. <sup>c</sup>Conversion was determined by GC analysis using toluene as an internal standard. <sup>d</sup>Selectivity = Yield of *n*-butanol/Conversion. <sup>e</sup>Total TON = Total yield of upgraded products/catalyst loading.



**Table S5.** Upgradation of ethanol by **5a** and **5b** heterogenized on versions solid supports.<sup>a</sup>

| Entry           | Catalyst /Support          | Time (min) | Yield (%) <sup>b</sup> |          |          |           |           | Conversion of <b>6</b> (%) <sup>c</sup> | Selectivity of <b>7</b> (%) <sup>d</sup> | Total TON <sup>e</sup> |
|-----------------|----------------------------|------------|------------------------|----------|----------|-----------|-----------|-----------------------------------------|------------------------------------------|------------------------|
|                 |                            |            | <b>7</b>               | <b>8</b> | <b>9</b> | <b>10</b> | <b>11</b> |                                         |                                          |                        |
| 1               | <b>5a</b>                  | 30         | 2.8                    | 0.0      | 0.0      | 0.0       | 0.0       | 2.8                                     | 100                                      | 1245                   |
|                 |                            | 120        | 22.8                   | 2.0      | 0.0      | 4.5       | 0.0       | 29.3                                    | 78                                       | 13022                  |
| 2               | <b>5a</b> /Neutral Alumina | 30         | 4.2                    | 0.0      | 0.0      | 0.0       | 0.0       | 4.2                                     | 100                                      | 1867                   |
|                 |                            | 120        | 6.9                    | 0.7      | 0.1      | 1.2       | 0.3       | 9.2                                     | 75                                       | 4090                   |
| 3               | <b>5a</b> /Acidic Alumina  | 30         | 2.7                    | 0.0      | 0.0      | 0.0       | 0.0       | 2.7                                     | 100                                      | 1080                   |
|                 |                            | 120        | 5.2                    | 0.2      | 0.0      | 0.4       | 0.0       | 5.8                                     | 90                                       | 2580                   |
| 4               | <b>5a</b> /Basic Alumina   | 30         | 1.2                    | 0.0      | 0.0      | 0.0       | 0.0       | 1.2                                     | 100                                      | 533                    |
|                 |                            | 120        | 4.6                    | 0.2      | 0.0      | 0.3       | 0.0       | 5.1                                     | 92                                       | 2265                   |
| 5               | <b>5a</b> /Silica          | 30         | 2.2                    | 0.0      | 0.0      | 0.0       | 0.0       | 2.2                                     | 100                                      | 975                    |
|                 |                            | 120        | 9.1                    | 0.3      | 0.0      | 0.5       | 0.0       | 9.9                                     | 92                                       | 4400                   |
| 6               | <b>5a</b> /Florisil        | 30         | 2.1                    | 0.0      | 0.0      | 0.0       | 0.0       | 2.2                                     | 95                                       | 980                    |
|                 |                            | 120        | 9.1                    | 0.2      | 0.0      | 0.4       | 0.0       | 9.7                                     | 93                                       | 4310                   |
| 7               | <b>5b</b>                  | 30         | 5.2                    | 0.0      | 0.0      | 0.0       | 0.0       | 5.2                                     | 99                                       | 2310                   |
|                 |                            | 120        | 25.4                   | 1.9      | 0.0      | 1.3       | 0.0       | 28.6                                    | 89                                       | 12710                  |
| 8               | <b>5b</b> /Neutral Alumina | 30         | 6.2                    | 0.2      | 0.0      | 2.9       | 0.0       | 9.3                                     | 67                                       | 4135                   |
|                 |                            | 120        | 13.0                   | 0.7      | 0.0      | 5.8       | 0.0       | 19.6                                    | 66                                       | 8710                   |
| 9               | <b>5b</b> /Acidic Alumina  | 30         | 5.6                    | 0.0      | 0.0      | 0.0       | 0.0       | 5.6                                     | 100                                      | 2489                   |
|                 |                            | 120        | 26.8                   | 3.4      | 0.0      | 4.8       | 0.0       | 34.9                                    | 77                                       | 15510                  |
| 10              | <b>5b</b> /Basic Alumina   | 30         | 2.6                    | 0.1      | 0.0      | 0.1       | 0.0       | 2.7                                     | 96                                       | 1200                   |
|                 |                            | 120        | 5.8                    | 0.4      | 0.0      | 0.3       | 0.0       | 6.4                                     | 90                                       | 2845                   |
| 11              | <b>5b</b> /Silica          | 30         | 6.2                    | 0.1      | 0.0      | 0.2       | 0.0       | 6.5                                     | 95                                       | 2890                   |
|                 |                            | 120        | 21.2                   | 2.0      | 0.3      | 3.2       | 0.9       | 27.7                                    | 76                                       | 12310                  |
| 12              | <b>5b</b> /Florisil        | 30         | 2.9                    | 0.0      | 0.0      | 0.0       | 0.0       | 2.9                                     | 100                                      | 1290                   |
|                 |                            | 120        | 9.6                    | 0.8      | 0.0      | 0.5       | 0.0       | 10.9                                    | 88                                       | 4845                   |
| 13 <sup>f</sup> | Alumina                    |            |                        |          |          |           |           |                                         |                                          |                        |
|                 | Silica                     | 120        | 0.0                    | 0.0      | 0.0      | 0.0       | 0.0       | 0.0                                     | --                                       | --                     |
|                 | Florisil                   |            |                        |          |          |           |           |                                         |                                          |                        |

<sup>a</sup>Reaction condition: ethanol (1 mL, 17.12 mmol), NaOEt (10 mol %) **5a-b** (0.00225 mol %) at 110 °C under 75 W microwave. <sup>b</sup>Yield was determined by GC analysis using toluene as an internal standard. <sup>c</sup>Conversion was determined by GC analysis using toluene as an internal standard. <sup>d</sup>Selectivity = Yield of *n*-butanol/Conversion. <sup>e</sup>Total TON = Total yield of upgraded products/**5a-b** loading. <sup>f</sup>No Catalyst.

**Table S6.** Upgradation of ethanol by **4a** and **4b** heterogenized on versions solid supports.<sup>a</sup>

| entry | Catalyst /Support  | Time (min) | Yield of (%) <sup>b</sup> |          |          |           |           | Conversion of <b>6</b> (%) <sup>c</sup> | Selectivity of <b>7</b> (%) <sup>d</sup> | Total TON <sup>e</sup> |
|-------|--------------------|------------|---------------------------|----------|----------|-----------|-----------|-----------------------------------------|------------------------------------------|------------------------|
|       |                    |            | <b>7</b>                  | <b>8</b> | <b>9</b> | <b>10</b> | <b>11</b> |                                         |                                          |                        |
| 1     | <b>4a</b>          | 30         | 9.0                       | 0.5      | 0.0      | 0.7       | 0.0       | 10.1                                    | 90                                       | 4489                   |
|       |                    | 120        | 19.1                      | 2.8      | 1.2      | 2.5       | 1.3       | 26.9                                    | 71                                       | 11955                  |
| 2     | <b>4a/Neutral</b>  | 30         | 7.7                       | 0.0      | 0.0      | 0.0       | 0.0       | 7.7                                     | 100                                      | 3380                   |
|       | Alumina            | 120        | 23.5                      | 0.0      | 0.0      | 0.8       | 0.0       | 24.3                                    | 97                                       | 10800                  |
| 3     | <b>4a/Acidic</b>   | 30         | trace                     | 0.0      | 0.0      | 0.0       | 0.0       | trace                                   | --                                       | --                     |
|       | Alumina            | 120        | 3.0                       | 0.0      | 0.1      | 0.0       | 0.0       | 3.1                                     | 98                                       | 1375                   |
| 4     | <b>4a/Basic</b>    | 30         | 2.5                       | 0.0      | 0.0      | 0.0       | 0.0       | 2.5                                     | 100                                      | 1110                   |
|       | Alumina            | 120        | 9.2                       | 1.1      | 0.0      | 1.4       | 0.0       | 11.7                                    | 78                                       | 5200                   |
| 5     | <b>4a/Silica</b>   | 30         | 6.7                       | 0.0      | 0.0      | 0.0       | 0.0       | 6.7                                     | 100                                      | 2978                   |
|       |                    | 120        | 17.8                      | 2.0      | 0.1      | 3.4       | 0.2       | 23.5                                    | 76                                       | 10445                  |
| 6     | <b>4a/Florisil</b> | 30         | 5.2                       | 0.3      | 0.0      | 0.5       | 0.0       | 6.0                                     | 86                                       | 2660                   |
|       |                    | 120        | 15.2                      | 2.1      | 0.4      | 2.5       | 0.5       | 20.7                                    | 73                                       | 9200                   |
| 7     | <b>4b</b>          | 30         | 5.8                       | 0.3      | 0.0      | 0.4       | 0.0       | 6.5                                     | 89                                       | 2889                   |
|       |                    | 120        | 19.7                      | 1.6      | 0.5      | 1.7       | 0.6       | 24.1                                    | 82                                       | 10711                  |
| 8     | <b>4b/Neutral</b>  | 30         | 1.8                       | 0.0      | 0.0      | 0.1       | 0.0       | 1.9                                     | 94                                       | 845                    |
|       | Alumina            | 120        | 6.2                       | 0.5      | 0.0      | 0.5       | 0.0       | 7.1                                     | 87                                       | 3155                   |
| 9     | <b>4b/Acidic</b>   | 30         | 0.5                       | 0.0      | 0.0      | 0.0       | 0.0       | 0.5                                     | 100                                      | 230                    |
|       | Alumina            | 120        | 1.0                       | 0.0      | 0.0      | 0.0       | 0.0       | 1.0                                     | 100                                      | 444                    |
| 10    | <b>4b/Basic</b>    | 30         | 3.6                       | 0.3      | 0.0      | 0.3       | 0.0       | 4.3                                     | 86                                       | 1865                   |
|       | Alumina            | 120        | 12.1                      | 2.4      | 0.0      | 2.8       | 0.0       | 17.2                                    | 70                                       | 7645                   |
| 11    | <b>4b/Silica</b>   | 30         | 0.6                       | 0.0      | 0.0      | 0.0       | 0.0       | 0.6                                     | 100                                      | 266                    |
|       |                    | 120        | 2.2                       | 0.0      | 0.0      | 0.0       | 0.0       | 2.2                                     | 100                                      | 978                    |
| 12    | <b>4b/Florisil</b> | 30         | 0.6                       | 0.0      | 0.0      | 0.0       | 0.0       | 0.6                                     | 100                                      | 270                    |
|       |                    | 120        | 1.3                       | 0.0      | 0.0      | 0.0       | 0.0       | 1.3                                     | 100                                      | 580                    |

<sup>a</sup>Reaction condition: ethanol (1 mL, 17.12 mmol), NaOEt (10 mol %) **4a-b** (0.00225 mol %) at 110 °C under 75 W microwave. <sup>b</sup>Yield was determined by GC analysis using toluene as an internal standard. <sup>c</sup>Conversion was determined by GC analysis using toluene as an internal standard. <sup>d</sup>Selectivity = Yield of *n*-butanol/Conversion. <sup>e</sup>Total TON = Total yield of upgraded products/**4a-b** loading.

## NMR and HRMS data

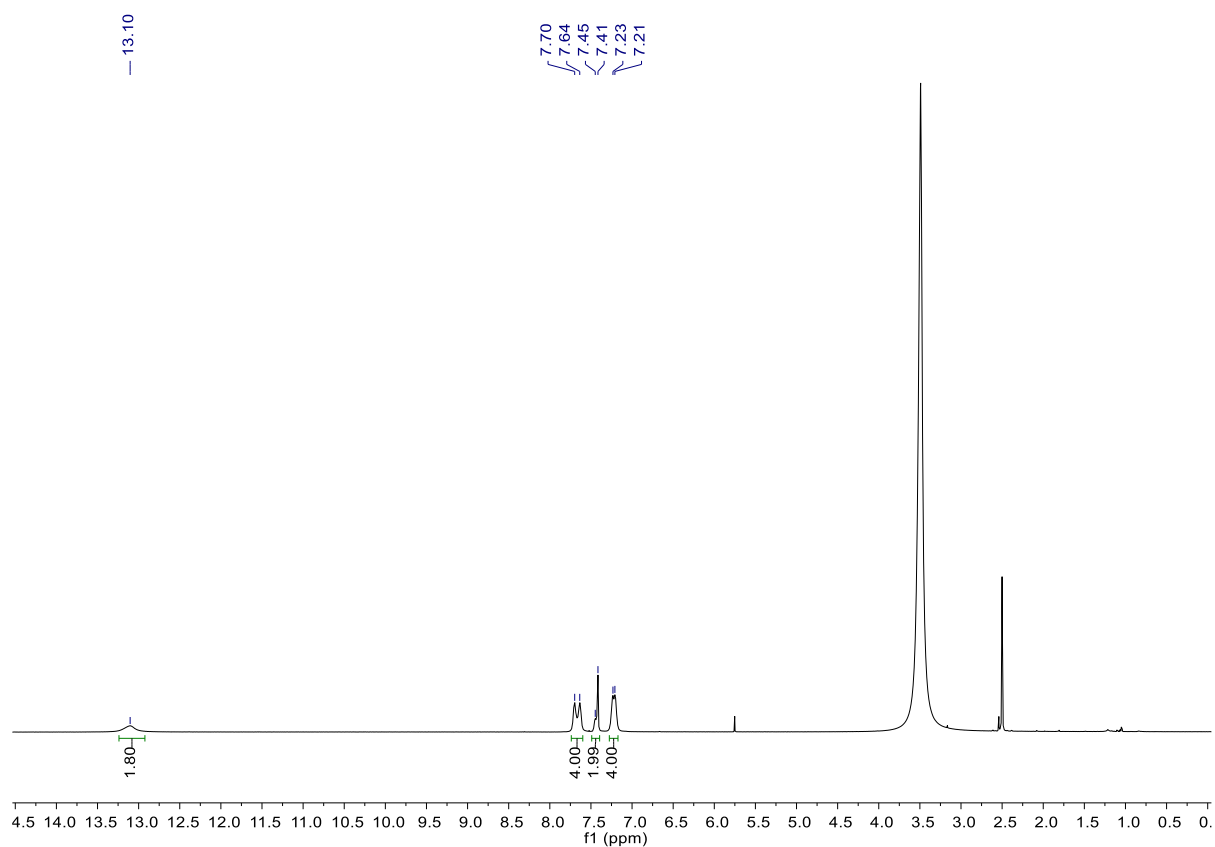

**Figure S1:**  $^1\text{H}$  NMR spectra of  $(p\text{-OH})\text{Bim}_2\text{NNN}$  ligand (C)

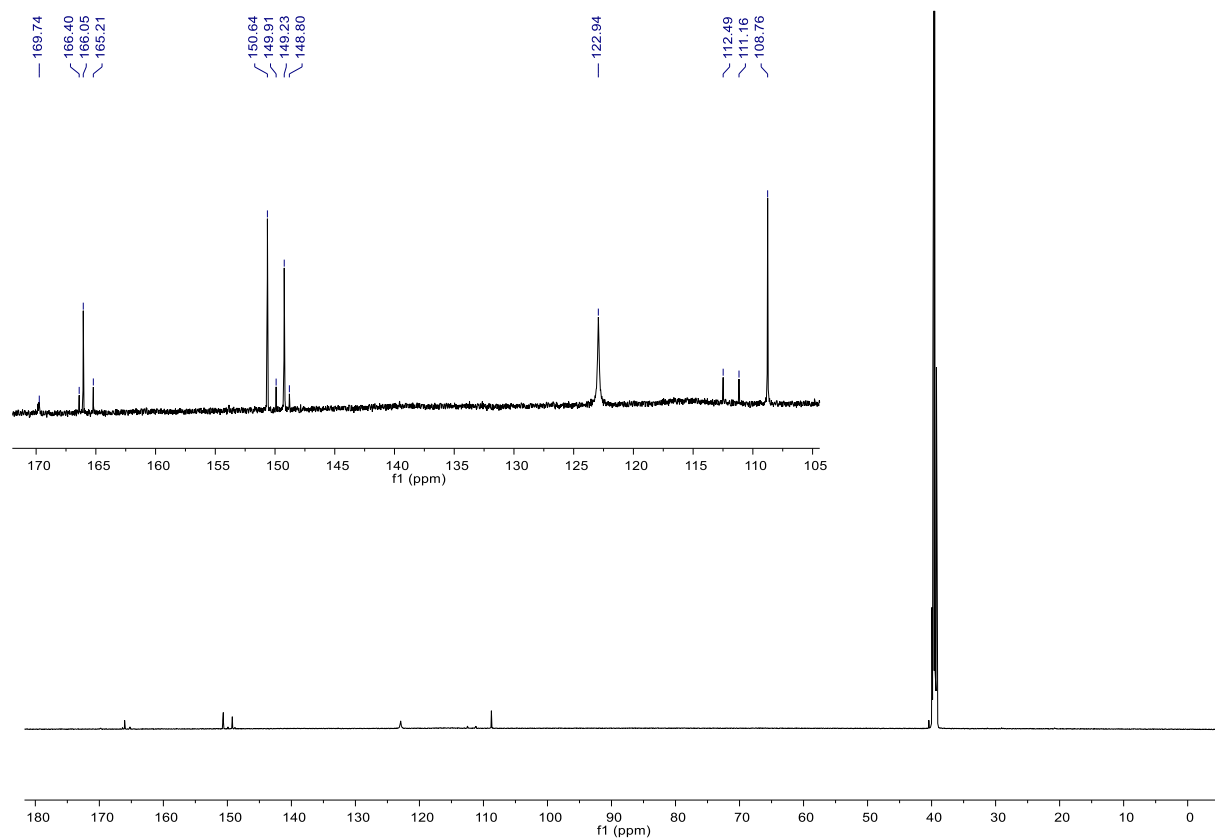

**Figure S2:**  $^{13}\text{C}$  NMR spectra of  $(p\text{-OH})\text{Bim}_2\text{NNN}$  ligand (C)

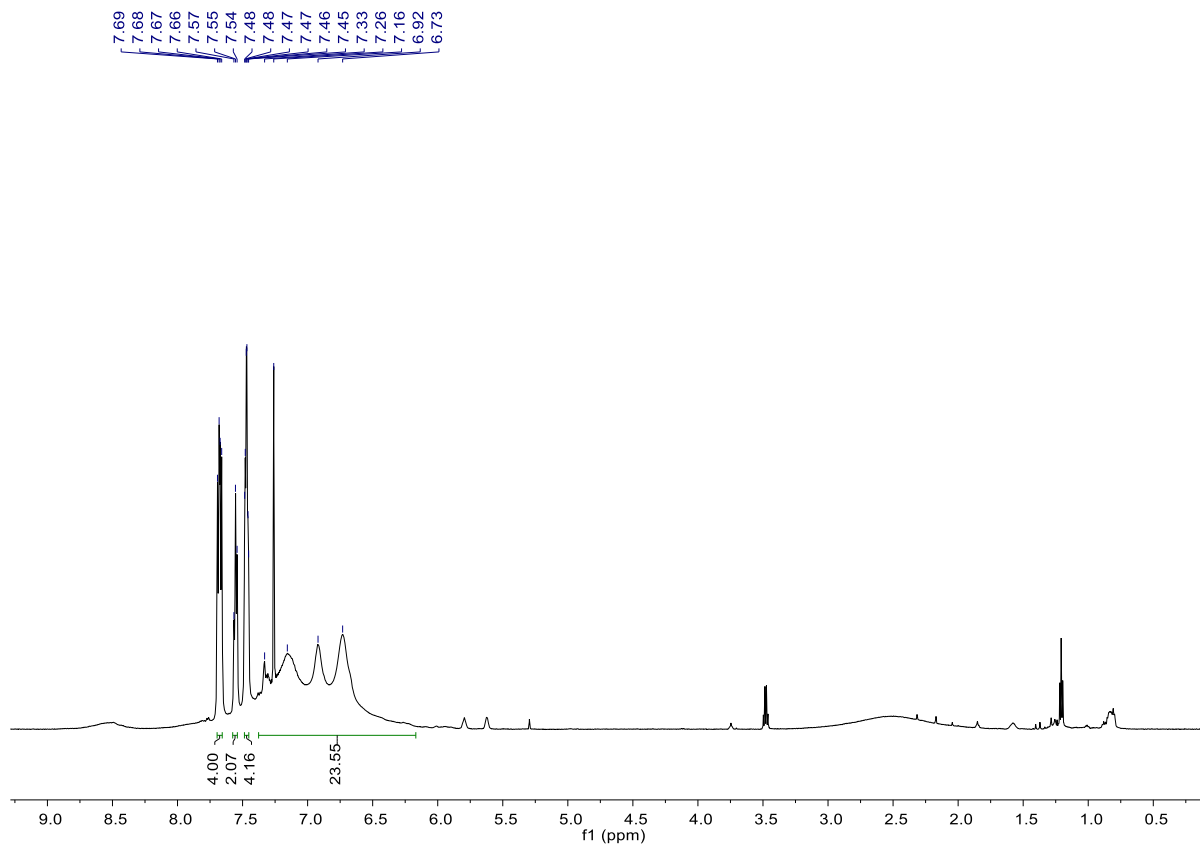

**Figure S3:**  $^1\text{H}$  NMR spectra of  $[(p\text{-OH})\text{Bim}^2\text{NNN})\text{RuCl}(\text{PPh}_3)_2]\text{Cl}$  (**4b**)

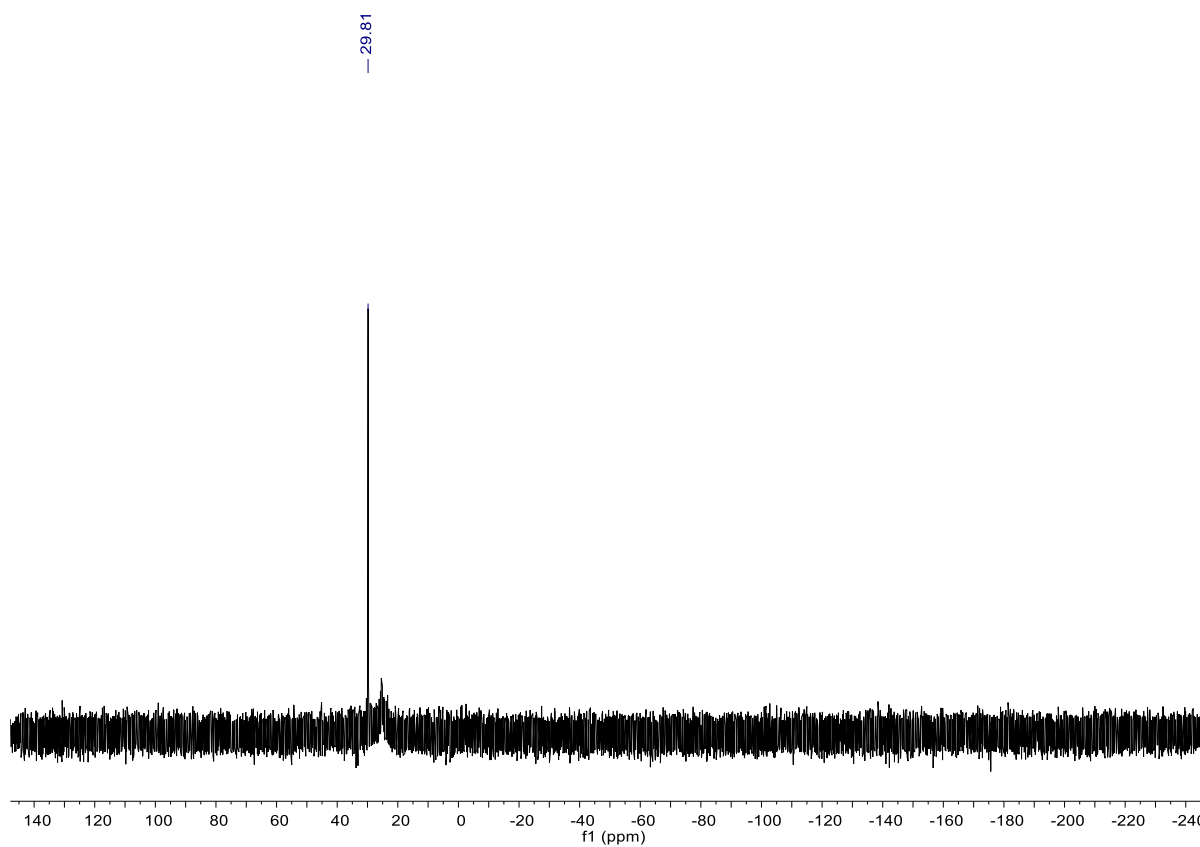

**Figure S4:**  $^{31}\text{P}$  NMR spectra of  $[(p\text{-OH})\text{Bim}^2\text{NNN})\text{RuCl}(\text{PPh}_3)_2]\text{Cl}$  (**4b**)

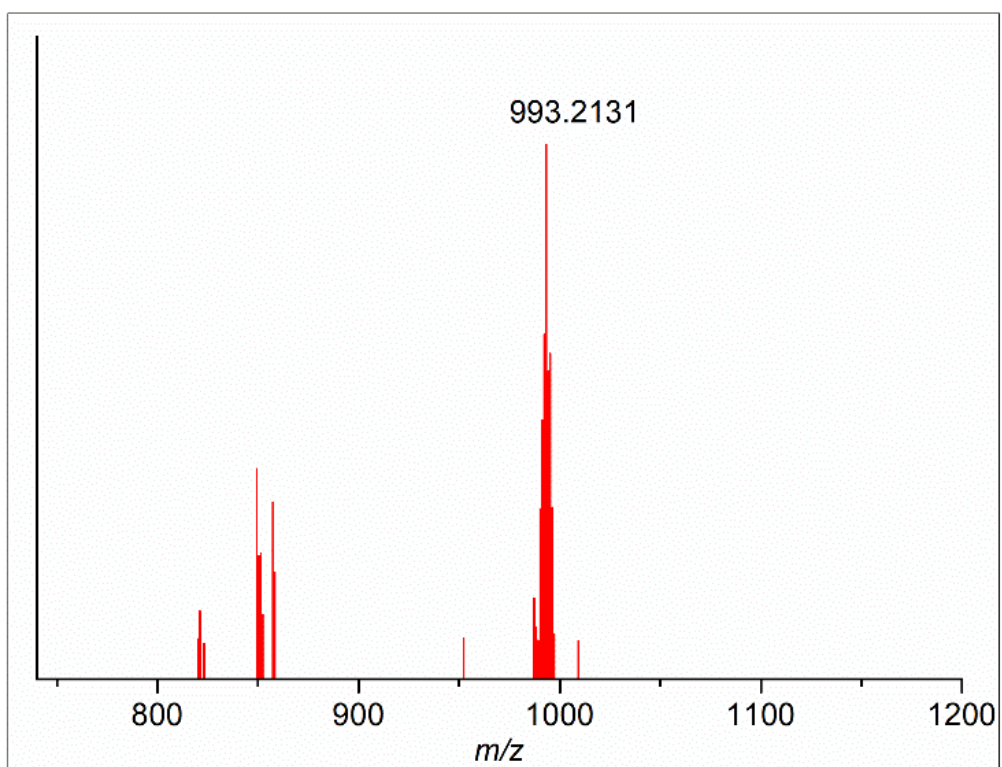

**Figure S5:** ESI-MS full spectra of **4b**

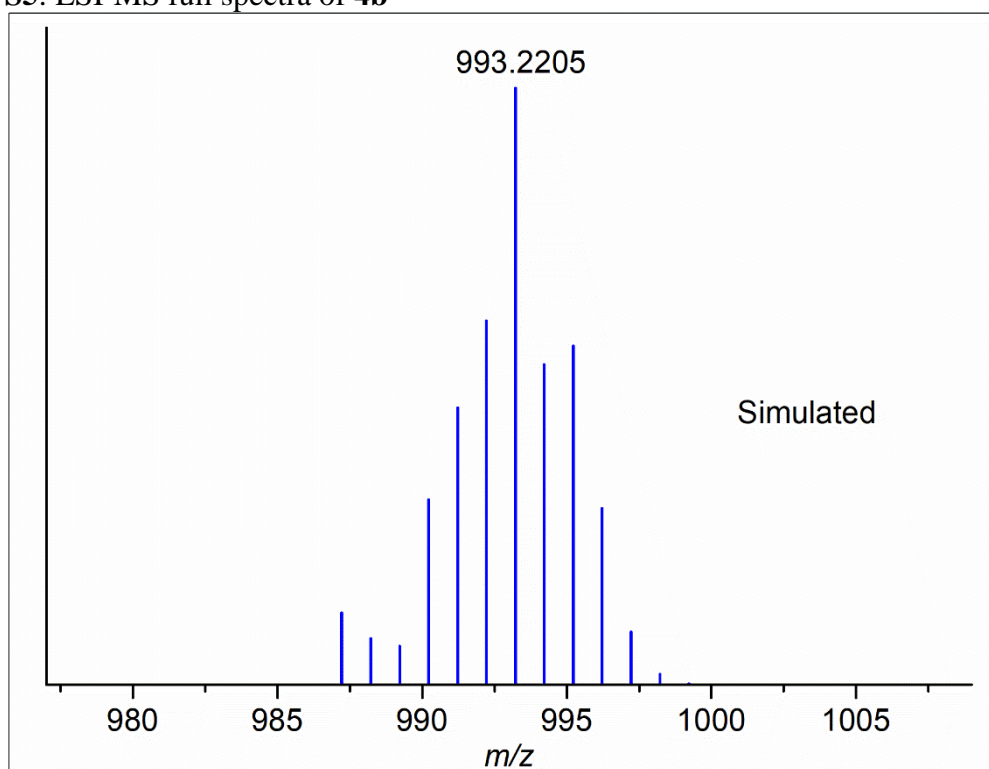

**Figure S6:** ESI-MS full spectra of **4b** with simulated data

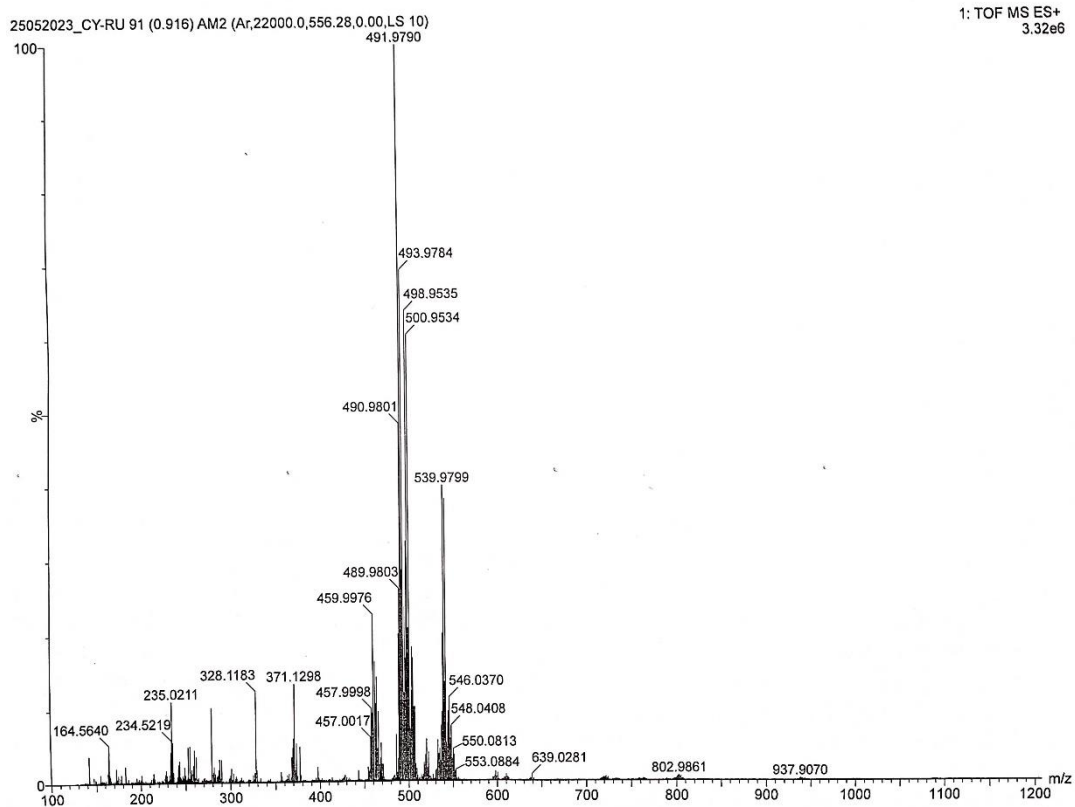

**Figure S7:** ESI-MS full spectra of **5b**

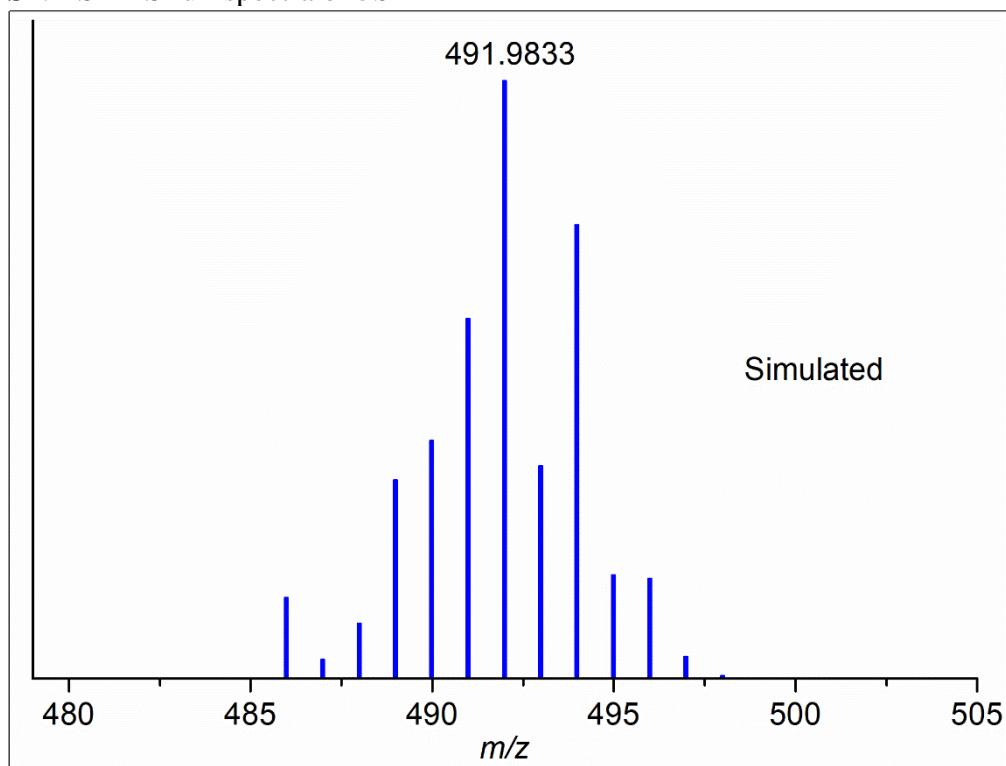

**Figure S8:** ESI-MS full spectra of **5b** with simulated data

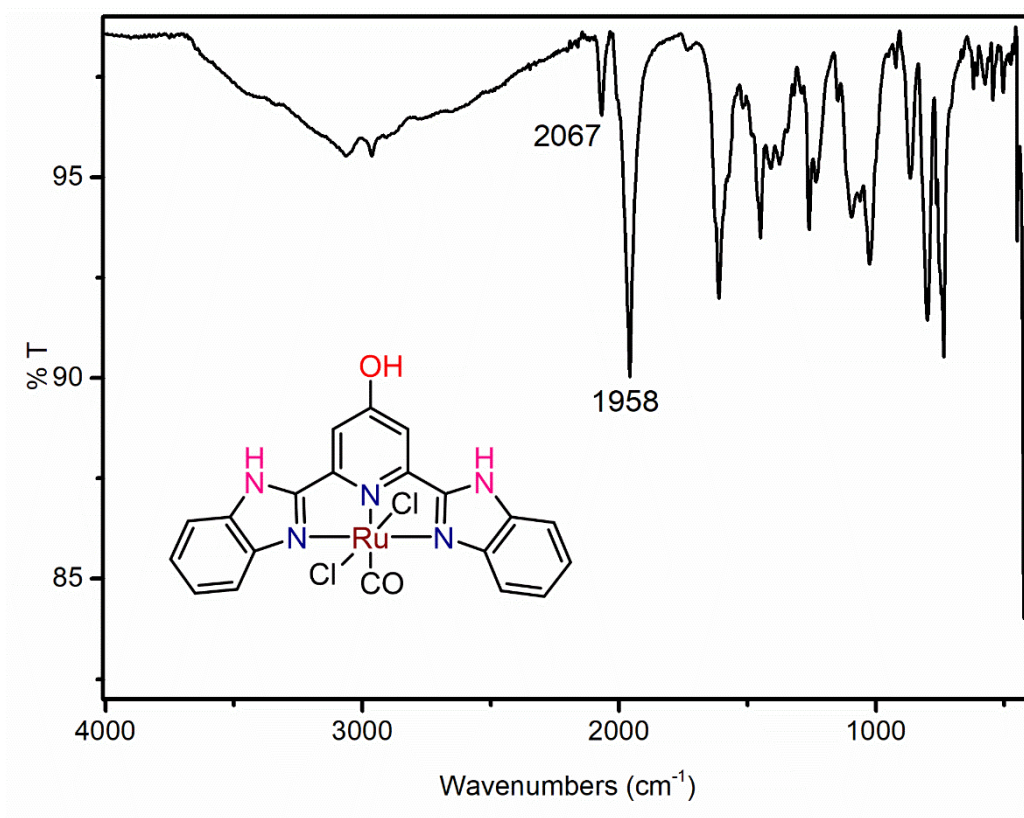

**Figure S9:** IR spectra of **5b**

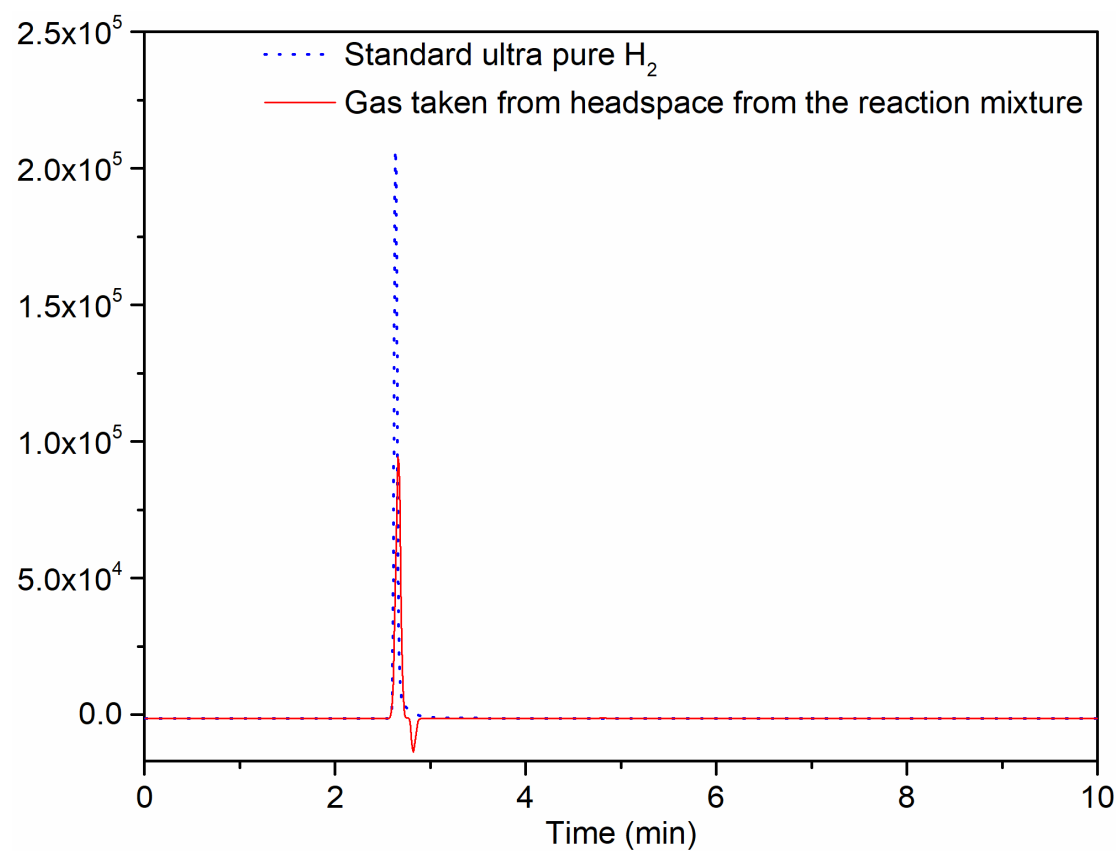

**Figure S10:** Hydrogen evolution detection by GC analysis.

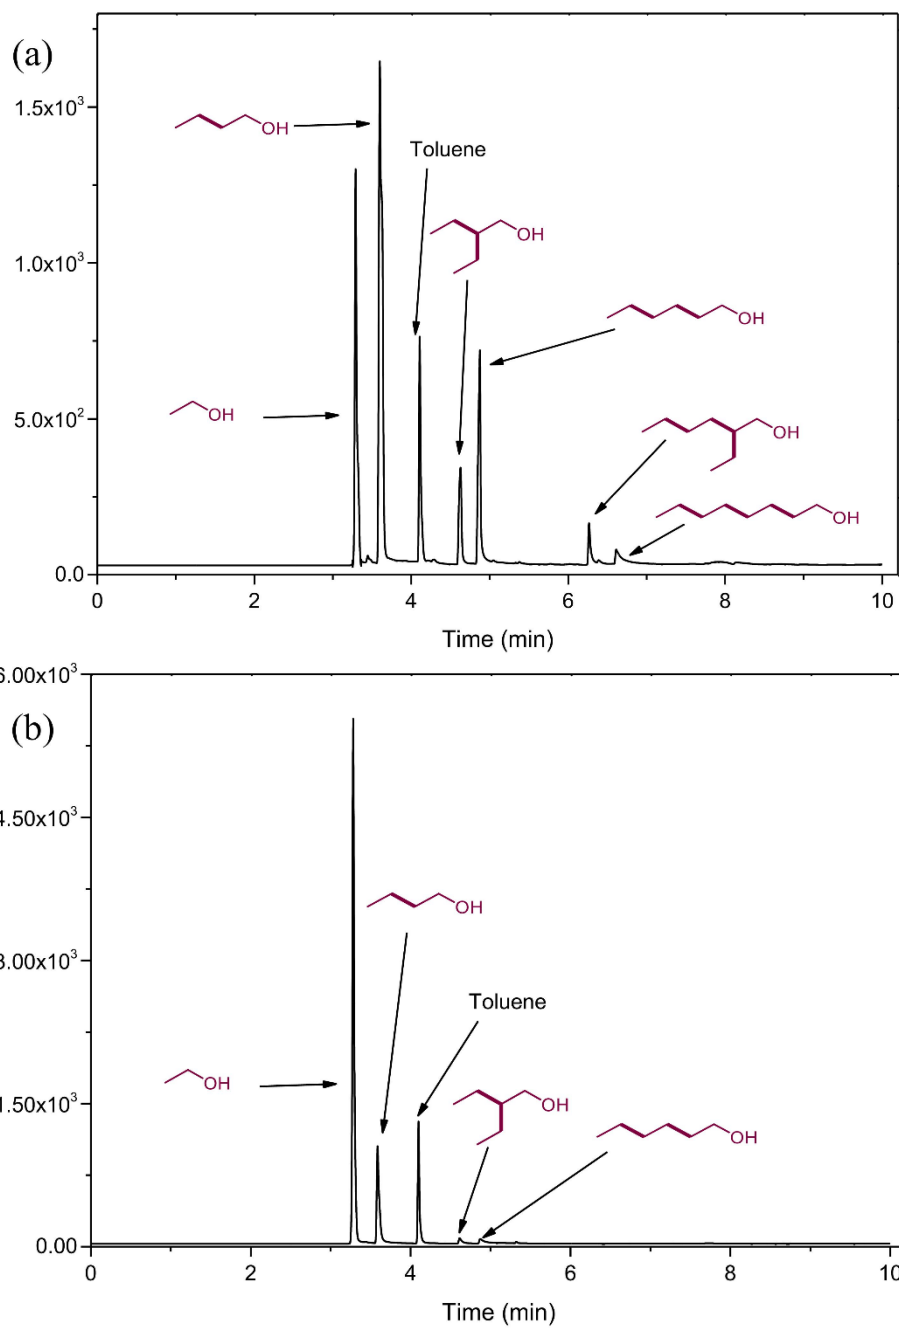

**Figure S11:** Two representative GC-FID spectra for Guerbet reaction.



## Computational details

**Table S6: Optimized XYZ coordinates for 12**

|    |            |            |            |   |            |            |            |
|----|------------|------------|------------|---|------------|------------|------------|
| C  | -1.1245700 | 2.2155400  | -0.3571400 | C | 5.7050400  | -0.1082200 | 0.1574000  |
| C  | -1.1120500 | 3.5773300  | -0.6655400 | C | 4.9286200  | -2.3997200 | 0.5726200  |
| C  | 0.1089600  | 4.2471000  | -0.8296900 | H | 2.7722300  | -2.7440400 | 0.5870400  |
| C  | 1.3095400  | 3.5402600  | -0.6779800 | C | 5.9678200  | -1.4556000 | 0.4186300  |
| C  | 1.2882500  | 2.1780700  | -0.3705000 | H | 6.5132900  | 0.6164800  | 0.0402300  |
| H  | -2.0563700 | 4.1147500  | -0.7755200 | H | 5.1842100  | -3.4416500 | 0.7749600  |
| H  | 0.1243100  | 5.3098400  | -1.0719500 | H | 7.0049900  | -1.7860000 | 0.5056000  |
| H  | 2.2681700  | 4.0497200  | -0.7973000 | C | -2.2415700 | 1.3430000  | -0.1477100 |
| N  | 0.0701500  | 1.5025100  | -0.2234500 | C | -4.2515600 | 0.4117100  | 0.1500500  |
| Ru | 0.0497400  | -0.3764600 | 0.1631200  | H | -4.0224200 | 2.5134500  | -0.2297800 |
| H  | -1.1907100 | -1.0856000 | -2.8600500 | C | -3.2309600 | -0.5690300 | 0.2900000  |
| C  | -0.9186600 | -1.9483700 | -2.2173800 | C | -5.6053500 | 0.0950500  | 0.2972600  |
| C  | -0.4922900 | -3.1302500 | -3.0852300 | C | -3.5543400 | -1.8979800 | 0.5931400  |
| O  | 0.1662000  | -1.5919400 | -1.3765700 | C | -5.9114500 | -1.2360500 | 0.5937200  |
| Cl | 0.0097200  | -0.1453800 | 2.5570300  | H | -6.3884100 | 0.8486200  | 0.1922700  |
| H  | -1.8263800 | -2.2159300 | -1.6381500 | C | -4.9046000 | -2.2149700 | 0.7412800  |
| H  | -0.2359300 | -3.9934700 | -2.4522700 | H | -2.7636900 | -2.6385000 | 0.7241600  |
| H  | -1.3026900 | -3.4264900 | -3.7710900 | H | -6.9571100 | -1.5240200 | 0.7199000  |
| H  | 0.3961000  | -2.8664200 | -3.6781200 | H | -5.1919600 | -3.2399600 | 0.9832300  |
| C  | 2.3796800  | 1.2727700  | -0.1732800 | N | -1.9997200 | 0.0302300  | 0.0845300  |
| C  | 3.3079800  | -0.6817100 | 0.2148900  | N | 2.0964400  | -0.0300700 | 0.0666400  |
| C  | 4.3604500  | 0.2625100  | 0.0572500  | N | 3.7415600  | 1.4790300  | -0.1927000 |
| H  | 4.2035700  | 2.3736500  | -0.3064800 | N | -3.5936900 | 1.6002300  | -0.1330100 |
| C  | 3.5881000  | -2.0292700 | 0.4723800  |   |            |            |            |

**Table S7: Optimized XYZ coordinates for TS-13**

|    |            |            |            |   |            |            |            |
|----|------------|------------|------------|---|------------|------------|------------|
| C  | -1.2379700 | 2.2375800  | -0.2566800 | C | 5.6053500  | 0.0628200  | 0.2815500  |
| C  | -1.2745500 | 3.6406800  | -0.3710100 | C | 4.9022900  | -2.2786400 | 0.5024300  |
| C  | -0.0650900 | 4.3393900  | -0.4259700 | H | 2.7616800  | -2.7001500 | 0.3979500  |
| C  | 1.1617300  | 3.6580200  | -0.3604300 | C | 5.9095100  | -1.2872000 | 0.4659400  |
| C  | 1.1408100  | 2.2607900  | -0.2376600 | H | 6.3859200  | 0.8261000  | 0.2702100  |
| H  | -2.2252300 | 4.1754900  | -0.4115100 | H | 5.1886400  | -3.3186000 | 0.6708000  |
| H  | -0.0734600 | 5.4268500  | -0.5178400 | H | 6.9525400  | -1.5828700 | 0.5963000  |
| H  | 2.1037800  | 4.2072000  | -0.4032800 | C | -2.3177600 | 1.2892100  | -0.1593200 |
| N  | -0.0397700 | 1.5860600  | -0.2016700 | C | -4.2980500 | 0.2806900  | 0.0829500  |
| Ru | -0.0290100 | -0.4408600 | -0.0702900 | H | -4.1313100 | 2.4123400  | -0.0995000 |
| H  | -1.2928200 | -2.3436600 | -1.5781300 | C | -3.2514800 | -0.6814700 | 0.1106400  |
| C  | -0.2253000 | -2.0378800 | -1.5987600 | C | -5.6406800 | -0.0843000 | 0.2317000  |
| C  | 0.7355200  | -3.1845800 | -1.8632800 | C | -3.5334400 | -2.0378200 | 0.3164600  |
| O  | 0.0504000  | -0.8751400 | -2.1437400 | C | -5.9055300 | -1.4421500 | 0.4210000  |
| Cl | -0.0104700 | -0.2850500 | 2.3497300  | H | -6.4444000 | 0.6543900  | 0.2101700  |
| H  | 0.0164400  | -2.0896700 | 0.1073500  | C | -4.8699300 | -2.4026400 | 0.4681400  |
| H  | 1.7750000  | -2.8534900 | -1.7357800 | H | -2.7169100 | -2.7587500 | 0.3765800  |
| H  | 0.5370000  | -4.0487700 | -1.2116400 | H | -6.9403000 | -1.7682700 | 0.5447100  |
| H  | 0.6061400  | -3.5024500 | -2.9121500 | H | -5.1254200 | -3.4506800 | 0.6358500  |
| C  | 2.2452000  | 1.3287000  | -0.1242000 | N | -2.0370800 | -0.0356400 | -0.0598600 |
| C  | 3.2349700  | -0.6076700 | 0.1355900  | N | 2.0056500  | 0.0014300  | -0.0410400 |
| C  | 4.2531900  | 0.3851900  | 0.1241000  | N | 3.5923600  | 1.5915900  | -0.0469300 |
| H  | 4.0152100  | 2.5129600  | -0.0422600 | N | -3.6773100 | 1.5063700  | -0.0949200 |
| C  | 3.5565500  | -1.9556600 | 0.3418800  |   |            |            |            |

**Table S8: Optimized XYZ coordinates for 14**

|    |            |            |            |   |            |            |            |
|----|------------|------------|------------|---|------------|------------|------------|
| C  | -1.1977300 | 2.2060700  | 0.0207500  | C | 5.9302000  | -1.4492100 | -0.0550300 |
| C  | -1.2135400 | 3.6057400  | 0.0527800  | H | 6.4421900  | 0.6658600  | -0.0311500 |
| C  | 0.0000000  | 4.3079100  | 0.0666200  | H | 5.1799800  | -3.4799200 | -0.0771600 |
| C  | 1.2135400  | 3.6057400  | 0.0527800  | H | 6.9731700  | -1.7730100 | -0.0672800 |
| C  | 1.1977300  | 2.2060700  | 0.0207500  | C | -2.2952300 | 1.2779000  | 0.0080100  |
| H  | -2.1633900 | 4.1444200  | 0.0674300  | C | -4.2942300 | 0.2767900  | -0.0197600 |
| H  | 0.0000000  | 5.3982500  | 0.0910400  | H | -4.0997800 | 2.4167500  | 0.0046800  |
| H  | 2.1633900  | 4.1444200  | 0.0674300  | C | -3.2591300 | -0.6981100 | -0.0243400 |
| N  | 0.0000000  | 1.5073000  | 0.0042200  | C | -5.6461900 | -0.0816000 | -0.0346000 |
| Ru | 0.0000000  | -0.4490600 | -0.0203900 | C | -3.5580400 | -2.0670000 | -0.0457300 |
| Cl | 0.0000000  | -2.8309300 | 0.2466600  | C | -5.9302000 | -1.4492100 | -0.0550300 |
| H  | 0.0000010  | -0.3910700 | -1.5828500 | H | -6.4421900 | 0.6658600  | -0.0311500 |
| C  | 2.2952300  | 1.2779000  | 0.0080100  | C | -4.9058600 | -2.4231900 | -0.0606900 |
| C  | 3.2591300  | -0.6981100 | -0.0243400 | H | -2.7430800 | -2.7938300 | -0.0453200 |
| C  | 4.2942300  | 0.2767900  | -0.0197600 | H | -6.9731700 | -1.7730100 | -0.0672700 |
| H  | 4.0997800  | 2.4167500  | 0.0046800  | H | -5.1799800 | -3.4799200 | -0.0771600 |
| C  | 3.5580400  | -2.0670000 | -0.0457300 | N | -2.0284000 | -0.0535200 | -0.0039800 |
| C  | 5.6461900  | -0.0816000 | -0.0346000 | N | 2.0284000  | -0.0535200 | -0.0039800 |
| C  | 4.9058600  | -2.4231900 | -0.0606900 | N | 3.6531200  | 1.5070600  | 0.0016500  |
| H  | 2.7430800  | -2.7938300 | -0.0453200 | N | -3.6531200 | 1.5070600  | 0.0016500  |

**Table S9: Optimized XYZ coordinates for TS-15**

|    |            |            |            |   |            |            |            |
|----|------------|------------|------------|---|------------|------------|------------|
| C  | 1.1061400  | 2.1436100  | 0.0344300  | C | -4.9458700 | -2.5293900 | -0.2133300 |
| C  | 1.1187800  | 3.5425400  | 0.1128500  | H | -2.7899900 | -2.8782200 | -0.2957900 |
| C  | -0.0991500 | 4.2308900  | 0.1955600  | C | -5.9787500 | -1.5700100 | -0.1121500 |
| C  | -1.3086800 | 3.5230500  | 0.1802500  | H | -6.5094300 | 0.5321700  | 0.0664300  |
| C  | -1.2802200 | 2.1245300  | 0.1023100  | H | -5.2098800 | -3.5853900 | -0.2972800 |
| H  | 2.0635800  | 4.0892600  | 0.0971000  | H | -7.0182800 | -1.9044300 | -0.1176600 |
| H  | -0.1063000 | 5.3200400  | 0.2545500  | C | 2.2063400  | 1.2227400  | -0.0820400 |
| H  | -2.2611200 | 4.0554800  | 0.2151200  | C | 4.2048700  | 0.2357400  | -0.2408800 |
| N  | -0.0816200 | 1.4481900  | 0.0627400  | H | 4.0034600  | 2.3709000  | -0.1219800 |
| Ru | -0.0761200 | -0.5154900 | -0.1524600 | C | 3.1715200  | -0.7415000 | -0.2544200 |
| H  | 1.7993100  | -1.8625300 | 2.0406300  | C | 5.5554900  | -0.1170000 | -0.3290400 |
| C  | 0.9197100  | -1.5174500 | 2.6205600  | C | 3.4757700  | -2.1038500 | -0.3712000 |
| C  | 1.2262600  | -0.1775000 | 3.2828800  | C | 5.8426800  | -1.4799100 | -0.4348300 |
| O  | -0.2448000 | -1.4405400 | 1.8058000  | H | 6.3493100  | 0.6325100  | -0.3191900 |
| Cl | -0.0711000 | -0.2453000 | -2.5377100 | C | 4.8216400  | -2.4565600 | -0.4583100 |
| H  | -0.0633500 | -2.3037900 | -0.2977100 | H | 2.6700000  | -2.8387300 | -0.4063100 |
| H  | 0.3589600  | 0.1657900  | 3.8671200  | H | 6.8848500  | -1.7976600 | -0.5074100 |
| H  | 2.0930100  | -0.2609300 | 3.9593800  | H | 5.0962900  | -3.5087900 | -0.5539000 |
| H  | 1.4499700  | 0.5870800  | 2.5238100  | N | 1.9470400  | -0.1053000 | -0.1421000 |
| C  | -2.3707600 | 1.1872000  | 0.0373400  | N | -2.0961000 | -0.1331200 | -0.0721700 |
| C  | -3.3131200 | -0.7904600 | -0.1028700 | N | -3.7295900 | 1.4014900  | 0.0822900  |
| C  | -4.3587300 | 0.1690500  | -0.0057000 | N | 3.5616100  | 1.4588300  | -0.1289900 |
| H  | -4.1850400 | 2.3043600  | 0.1484000  | H | 0.7246100  | -2.2821400 | 3.3988400  |
| C  | -3.6031800 | -2.1562000 | -0.2115100 | H | -0.1473600 | -2.1619300 | 0.6851400  |
| C  | -5.7066500 | -0.2041200 | -0.0080400 |   |            |            |            |

**Table S10: Optimized XYZ coordinates for TS-16**

|    |            |            |            |   |            |            |            |
|----|------------|------------|------------|---|------------|------------|------------|
| C  | 1.2801200  | 2.2097100  | -0.0610500 | H | -6.3205600 | 0.7578200  | -0.6415000 |
| C  | 1.3188900  | 3.6105200  | -0.0313600 | H | -5.1032000 | -3.3946100 | -0.8585100 |
| C  | 0.1046000  | 4.3120600  | -0.0130700 | H | -6.8726900 | -1.6627500 | -0.8988300 |
| C  | -1.1144200 | 3.6266000  | -0.0286400 | C | 2.3713100  | 1.2595200  | -0.0931000 |
| C  | -1.0960300 | 2.2224900  | -0.0591000 | C | 4.3605800  | 0.2537300  | -0.2348800 |
| H  | 2.2690900  | 4.1473300  | -0.0193700 | H | 4.1697800  | 2.3924000  | -0.2543700 |
| H  | 0.1113800  | 5.4028400  | 0.0154700  | C | 3.3217400  | -0.7157100 | -0.1726400 |
| H  | -2.0578500 | 4.1748200  | -0.0130800 | C | 5.7072200  | -0.1110500 | -0.3382000 |
| N  | 0.0881100  | 1.5495400  | -0.0656700 | C | 3.6154100  | -2.0842300 | -0.2400300 |
| Ru | 0.0806700  | -0.4812300 | -0.0179200 | C | 5.9835800  | -1.4786100 | -0.3867900 |
| H  | -1.9006700 | -0.4917400 | 2.5048300  | H | 6.5047700  | 0.6329300  | -0.3861000 |
| C  | -0.9231900 | 0.0468100  | 2.6024400  | C | 4.9559300  | -2.4487900 | -0.3441000 |
| C  | 0.2451900  | -0.6944400 | 2.1323100  | H | 2.8049200  | -2.8142800 | -0.2384700 |
| O  | -0.8982300 | 1.2017600  | 3.0339200  | H | 7.0216000  | -1.8069000 | -0.4703500 |
| Cl | 0.1244900  | -0.5824000 | -2.4771500 | H | 5.2223900  | -3.5056800 | -0.4050900 |
| H  | 0.0856800  | -2.1303600 | -0.0912300 | N | 2.1044500  | -0.0661500 | -0.0690300 |
| H  | 1.2106200  | -0.2875300 | 2.4529500  | N | -1.9521300 | -0.0418100 | -0.1402900 |
| C  | -2.1976300 | 1.2905800  | -0.1291800 | N | -3.5428100 | 1.5435900  | -0.2641000 |
| C  | -3.1746600 | -0.6608300 | -0.3472000 | N | 3.7253900  | 1.4843800  | -0.1785600 |
| C  | -4.1935600 | 0.3294300  | -0.4084100 | C | 0.1877100  | -2.0322400 | 1.5740400  |
| H  | -3.9703200 | 2.4618200  | -0.3009100 | H | 1.1577100  | -2.5454300 | 1.5915300  |
| C  | -3.4863800 | -2.0157800 | -0.5189300 | C | -0.9577400 | -2.9866900 | 1.8731600  |
| C  | -5.5390800 | -0.0033500 | -0.5986400 | H | -1.9422800 | -2.5148700 | 1.7635800  |
| C  | -4.8255400 | -2.3487800 | -0.7137400 | H | -0.9261600 | -3.8602000 | 1.2047300  |
| H  | -2.6895400 | -2.7599300 | -0.5264900 | H | -0.8699100 | -3.3477600 | 2.9121000  |
| C  | -5.8350300 | -1.3599000 | -0.7443300 |   |            |            |            |

**Table S11: Optimized XYZ coordinates for 17**

|    |            |            |            |   |            |            |            |
|----|------------|------------|------------|---|------------|------------|------------|
| C  | 1.2027000  | 2.2483700  | 0.0454800  | H | -6.4090500 | 0.6760300  | -0.4126000 |
| C  | 1.2236100  | 3.6408500  | 0.1587500  | H | -5.0420100 | -3.3927300 | -1.0109400 |
| C  | 0.0128400  | 4.3400700  | 0.2852200  | H | -6.8724800 | -1.7336400 | -0.8598500 |
| C  | -1.2001300 | 3.6436800  | 0.2672100  | C | 2.3027900  | 1.3288200  | -0.1136000 |
| C  | -1.1906800 | 2.2473600  | 0.1491000  | C | 4.2879400  | 0.3233900  | -0.3276600 |
| H  | 2.1730900  | 4.1791800  | 0.1376500  | H | 4.1089600  | 2.4621300  | -0.2072200 |
| H  | 0.0176400  | 5.4269400  | 0.3749600  | C | 3.2453000  | -0.6433900 | -0.3192100 |
| H  | -2.1482700 | 4.1819500  | 0.3253700  | C | 5.6301600  | -0.0490300 | -0.4562000 |
| N  | 0.0064300  | 1.5560100  | 0.0827100  | C | 3.5165100  | -2.0132800 | -0.4375100 |
| Ru | 0.0089200  | -0.3778900 | -0.1459000 | C | 5.8896800  | -1.4168700 | -0.5737300 |
| H  | -1.4608800 | -2.2464800 | 1.4198400  | H | 6.4370300  | 0.6863800  | -0.4676300 |
| C  | -0.3947000 | -2.0655800 | 1.1587900  | C | 4.8545000  | -2.3809100 | -0.5641500 |
| C  | 0.3435500  | -1.1081400 | 1.9256700  | H | 2.6872900  | -2.7239300 | -0.4274700 |
| O  | 0.1163600  | -2.6459300 | 0.1209500  | H | 6.9243100  | -1.7503100 | -0.6786000 |
| Cl | -0.0146900 | -0.2098500 | -2.5746500 | H | 5.1143600  | -3.4366300 | -0.6632100 |
| H  | -1.3904900 | -0.3120600 | 2.9036600  | N | 2.0367400  | 0.0093700  | -0.1860900 |
| H  | 1.4290100  | -1.2497000 | 1.9858200  | N | -2.0038800 | 0.0146600  | -0.1257100 |
| C  | -2.2871100 | 1.3298100  | 0.0241900  | N | -3.6473700 | 1.5431200  | -0.0398000 |
| C  | -3.2072800 | -0.6335400 | -0.3418400 | N | 3.6586800  | 1.5541500  | -0.1901100 |
| C  | -4.2590700 | 0.3204900  | -0.2814500 | C | -0.3030400 | -0.3848400 | 3.0828900  |
| H  | -4.1067700 | 2.4459800  | -0.0120800 | H | 0.0663400  | 0.6552300  | 3.1218800  |
| C  | -3.4649300 | -1.9839700 | -0.6119000 | C | -0.0374200 | -1.0710300 | 4.4336600  |
| C  | -5.5960600 | -0.0513000 | -0.4581500 | H | 1.0436700  | -1.1352500 | 4.6368500  |
| C  | -4.7974600 | -2.3517600 | -0.7914100 | H | -0.5050100 | -0.5202800 | 5.2655400  |
| H  | -2.6352100 | -2.6890000 | -0.6978700 | H | -0.4348400 | -2.0981400 | 4.4371600  |
| C  | -5.8424100 | -1.4032900 | -0.7103500 |   |            |            |            |

**Table S12: Optimized XYZ coordinates for TS-18**

|    |            |            |            |   |            |            |            |
|----|------------|------------|------------|---|------------|------------|------------|
| C  | -1.2085200 | 2.2844900  | -0.4570100 | H | 5.2602300  | -3.0143300 | 1.2860800  |
| C  | -1.2572400 | 3.6370200  | -0.8235300 | H | 7.0199200  | -1.3410600 | 0.8011400  |
| C  | -0.0529200 | 4.3203900  | -1.0465100 | C | -2.2832100 | 1.3770300  | -0.1363800 |
| C  | 1.1759100  | 3.6663000  | -0.8845800 | C | -4.2559000 | 0.4016300  | 0.2391700  |
| C  | 1.1740700  | 2.3121600  | -0.5168500 | H | -4.1109000 | 2.4334300  | -0.4364100 |
| H  | -2.2128500 | 4.1557500  | -0.9193100 | C | -3.1988400 | -0.5104800 | 0.5045500  |
| H  | -0.0726300 | 5.3737100  | -1.3304400 | C | -5.5985400 | 0.0424800  | 0.3983700  |
| H  | 2.1134700  | 4.2063900  | -1.0297000 | C | -3.4687600 | -1.8109100 | 0.9475400  |
| N  | -0.0053700 | 1.6403100  | -0.3402700 | C | -5.8510100 | -1.2583400 | 0.8367300  |
| Ru | 0.0244300  | -0.2784800 | 0.3008600  | H | -6.4113200 | 0.7413100  | 0.1910100  |
| H  | -1.3865000 | -3.0793200 | -2.4859000 | C | -4.8045500 | -2.1695100 | 1.1094800  |
| C  | -1.3215800 | -1.9900600 | -2.2089100 | H | -2.6442500 | -2.4937600 | 1.1573300  |
| C  | 0.0056100  | -1.5614600 | -1.7010500 | H | -6.8854700 | -1.5798700 | 0.9745000  |
| O  | -2.3032800 | -1.2708600 | -2.3521100 | H | -5.0541100 | -3.1744900 | 1.4553700  |
| Cl | 0.1165400  | 0.4769100  | 2.5856800  | N | -1.9922700 | 0.1144600  | 0.2540600  |
| H  | 2.1215100  | -1.9439900 | -1.7654300 | N | 2.0473600  | 0.1466300  | 0.1204200  |
| H  | 0.1748000  | -0.5283400 | -2.0479300 | N | 3.6372600  | 1.6848800  | -0.2894600 |
| C  | 2.2845500  | 1.4295500  | -0.2497400 | N | -3.6433300 | 1.5781900  | -0.1592000 |
| C  | 3.2859800  | -0.4285600 | 0.3535100  | C | 1.1954800  | -2.4726300 | -2.0408700 |
| C  | 4.3027400  | 0.5308100  | 0.0929000  | H | 1.2385300  | -2.6080600 | -3.1378800 |
| H  | 4.0632400  | 2.5799000  | -0.5013200 | C | 1.1783700  | -3.8488400 | -1.3618400 |
| C  | 3.6152700  | -1.7178300 | 0.7908400  | H | 0.2906900  | -4.4360400 | -1.6445000 |
| C  | 5.6604300  | 0.2280900  | 0.2418800  | H | 2.0668100  | -4.4361000 | -1.6401700 |
| C  | 4.9674000  | -2.0207100 | 0.9414500  | H | 1.1712400  | -3.7506600 | -0.2650000 |
| H  | 2.8231500  | -2.4329600 | 1.0165600  | H | 0.0383800  | -1.8602500 | 0.8838100  |
| C  | 5.9718900  | -1.0648500 | 0.6682200  | H | -0.0802100 | -1.8697100 | -0.2644700 |
| H  | 6.4410600  | 0.9648800  | 0.0423200  |   |            |            |            |

**Table S13: Optimized XYZ coordinates for TS-19**

|    |            |            |            |   |            |            |            |
|----|------------|------------|------------|---|------------|------------|------------|
| C  | 1.1960600  | 2.4814600  | 0.1230600  | C | 4.2728200  | 0.6054400  | -0.3499200 |
| C  | 1.2597900  | 3.8625100  | 0.3386800  | H | 4.0595200  | 2.6976100  | 0.0797300  |
| C  | 0.0708100  | 4.5938400  | 0.4370700  | C | 3.2439700  | -0.3694900 | -0.4839900 |
| C  | -1.1619100 | 3.9406400  | 0.3095400  | C | 5.6278600  | 0.2940400  | -0.4971200 |
| C  | -1.1838200 | 2.5585800  | 0.0952500  | C | 3.5787800  | -1.6922500 | -0.8045000 |
| H  | 2.2254100  | 4.3628000  | 0.4310700  | C | 5.9386000  | -1.0326000 | -0.7997100 |
| H  | 0.1033200  | 5.6703300  | 0.6090800  | H | 6.4060700  | 1.0520200  | -0.3874700 |
| H  | -2.0960100 | 4.5017700  | 0.3759800  | C | 4.9286600  | -2.0063600 | -0.9565300 |
| N  | -0.0099700 | 1.8374400  | 0.0201300  | H | 2.7990500  | -2.4368200 | -0.9477200 |
| Ru | -0.0934800 | -0.1034700 | -0.2410100 | H | 6.9843300  | -1.3198700 | -0.9267200 |
| H  | 1.8831900  | -0.7632500 | 2.3938500  | H | 5.2123500  | -3.0294000 | -1.2116700 |
| C  | 1.0141300  | -0.0556300 | 2.4357700  | N | 2.0109300  | 0.2383000  | -0.2715300 |
| C  | -0.2940200 | -0.6634800 | 2.0908700  | N | -2.0870700 | 0.3578700  | -0.2145200 |
| O  | 1.1995200  | 1.1258600  | 2.7282200  | N | -3.6628500 | 1.9481700  | -0.0882000 |
| Cl | -0.0835200 | 0.0457500  | -2.6164400 | N | 3.6228400  | 1.7977000  | -0.0834800 |
| H  | -1.5784600 | -2.3786200 | 2.4410400  | C | -0.7012500 | -1.9181300 | 2.9251000  |
| H  | -1.0873800 | 0.0898000  | 2.1963100  | H | -1.0397700 | -1.5502800 | 3.9097100  |
| C  | -2.3136700 | 1.6808000  | -0.0646100 | C | 0.3853000  | -2.9794000 | 3.1262300  |
| C  | -3.3224900 | -0.2520400 | -0.3496000 | H | 1.2291100  | -2.5983600 | 3.7209200  |
| C  | -4.3325700 | 0.7459800  | -0.2709400 | H | -0.0291800 | -3.8485300 | 3.6596000  |
| H  | -4.0853500 | 2.8675600  | -0.0292200 | H | 0.7866900  | -3.3388600 | 2.1672900  |
| C  | -3.6490200 | -1.6028100 | -0.5308700 | H | -0.3200000 | -1.4851400 | 0.9929400  |
| C  | -5.6908400 | 0.4260700  | -0.3687100 | O | -0.5537400 | -2.2205300 | -0.1336600 |
| C  | -5.0030900 | -1.9189100 | -0.6252300 | C | 0.3566100  | -3.2173300 | -0.5578800 |
| H  | -2.8413500 | -2.3349500 | -0.5872100 | H | 1.2584000  | -3.2360900 | 0.0921900  |
| C  | -6.0042700 | -0.9235200 | -0.5462400 | H | 0.6959800  | -2.9918700 | -1.5881500 |
| H  | -6.4696400 | 1.1891400  | -0.3115900 | C | -0.3239000 | -4.5835200 | -0.5172800 |
| H  | -5.3021700 | -2.9591500 | -0.7692100 | H | 0.3667100  | -5.3782800 | -0.8439200 |
| H  | -7.0532500 | -1.2158200 | -0.6291800 | H | -0.6654100 | -4.8157200 | 0.5038500  |
| C  | 2.2754200  | 1.5457100  | -0.0530400 | H | -1.2001300 | -4.5917600 | -1.1833800 |



**Table S14: Optimized XYZ coordinates for TS-20**

|    |            |            |            |   |            |            |            |
|----|------------|------------|------------|---|------------|------------|------------|
| C  | -1.2863200 | 2.2671400  | -0.2450100 | H | 6.3222600  | 0.8897200  | 0.5490100  |
| C  | -1.3297800 | 3.6622000  | -0.4366300 | H | 5.1263000  | -3.2500000 | 1.0137800  |
| C  | -0.1154100 | 4.3561200  | -0.5058200 | H | 6.8837700  | -1.5081400 | 0.9499500  |
| C  | 1.1125200  | 3.6900700  | -0.3724800 | C | -2.3634400 | 1.3098600  | -0.0809800 |
| C  | 1.0894700  | 2.2962700  | -0.1811300 | C | -4.3466700 | 0.3086800  | 0.1805800  |
| H  | -2.2779800 | 4.1971700  | -0.5142100 | H | -4.1789600 | 2.4305400  | -0.1006100 |
| H  | -0.1243200 | 5.4377000  | -0.6533400 | C | -3.2984300 | -0.6472100 | 0.2680500  |
| H  | 2.0506000  | 4.2470000  | -0.4023900 | C | -5.6902000 | -0.0578000 | 0.3204900  |
| N  | -0.0902300 | 1.6353500  | -0.1642300 | C | -3.5705000 | -1.9999400 | 0.5106700  |
| Ru | -0.0701400 | -0.4392500 | 0.1335100  | C | -5.9470800 | -1.4100300 | 0.5542500  |
| H  | 1.7653600  | -2.3548500 | -1.7509300 | H | -6.4990500 | 0.6726800  | 0.2565200  |
| C  | 0.6995400  | -2.7018200 | -1.7889600 | C | -4.9074300 | -2.3646500 | 0.6498100  |
| C  | -0.3171500 | -1.6296600 | -1.6962600 | H | -2.7449300 | -2.7085700 | 0.5979000  |
| O  | 0.4338500  | -3.8905900 | -1.8898000 | H | -6.9817400 | -1.7386800 | 0.6724700  |
| Cl | -0.0635000 | -0.0932700 | 2.5434700  | H | -5.1624400 | -3.4081000 | 0.8440300  |
| H  | -0.0546100 | -2.0427600 | 0.3636500  | N | -2.0843500 | -0.0065200 | 0.0978100  |
| H  | -1.3443300 | -2.0087200 | -1.7254800 | N | 1.9511400  | 0.0385400  | 0.1654900  |
| C  | 2.1868000  | 1.3658300  | 0.0332100  | N | 3.5320200  | 1.6358700  | 0.1326600  |
| C  | 3.1797100  | -0.5571700 | 0.3880200  | N | -3.7234900 | 1.5265800  | -0.0457400 |
| C  | 4.1930100  | 0.4395200  | 0.3665600  | C | -0.0692500 | -0.2844500 | -2.0899300 |
| H  | 3.9512000  | 2.5589400  | 0.1214200  | H | -0.9666600 | 0.2950100  | -2.3449900 |
| C  | 3.4963000  | -1.9018500 | 0.6248800  | C | 1.1711100  | 0.1956700  | -2.8060500 |
| C  | 5.5424300  | 0.1258100  | 0.5637300  | H | 2.0792400  | -0.3464100 | -2.5113300 |
| C  | 4.8390900  | -2.2146000 | 0.8215000  | H | 1.0387700  | 0.0657900  | -3.8947900 |
| H  | 2.6996300  | -2.6462600 | 0.6673000  | H | 1.3469200  | 1.2704400  | -2.6362700 |
| C  | 5.8433300  | -1.2186500 | 0.7883800  |   |            |            |            |

**Table S15: Optimized XYZ coordinates for 21**

|    |            |            |            |   |            |            |            |
|----|------------|------------|------------|---|------------|------------|------------|
| C  | 1.0035300  | 2.3975700  | -0.0618100 | H | -6.6004600 | 0.6591300  | -0.1520400 |
| C  | 0.9778000  | 3.7829200  | 0.1414100  | H | -5.2376200 | -3.4155800 | -0.7179600 |
| C  | -0.2542500 | 4.4404400  | 0.2589800  | H | -7.0711800 | -1.7730300 | -0.4546300 |
| C  | -1.4466400 | 3.7092400  | 0.1687700  | C | 2.1337700  | 1.5308900  | -0.2720700 |
| C  | -1.3927800 | 2.3246500  | -0.0309000 | C | 4.1568800  | 0.6440200  | -0.6207500 |
| H  | 1.9120100  | 4.3445100  | 0.2061700  | H | 3.8986500  | 2.7230000  | -0.1442400 |
| H  | -0.2851600 | 5.5188900  | 0.4182500  | C | 3.1559900  | -0.3552600 | -0.7609700 |
| H  | -2.4114700 | 4.2130500  | 0.2571900  | C | 5.5156000  | 0.3546600  | -0.7822400 |
| N  | -0.1745100 | 1.6646100  | -0.1440100 | C | 3.4960300  | -1.6786500 | -1.0738700 |
| Ru | -0.1116100 | -0.2807500 | -0.4163100 | C | 5.8415000  | -0.9683500 | -1.0898500 |
| H  | 0.7987500  | -2.1200600 | 4.1351900  | H | 6.2861900  | 1.1203000  | -0.6723000 |
| C  | 1.5278800  | -1.7591300 | 3.3578600  | C | 4.8509000  | -1.9657800 | -1.2342800 |
| C  | 1.0166700  | -1.7572900 | 1.9309500  | H | 2.7075700  | -2.4258400 | -1.1885700 |
| O  | 2.6315700  | -1.3689200 | 3.6892400  | H | 6.8914800  | -1.2374900 | -1.2224000 |
| Cl | -0.0937500 | -2.5632500 | -1.2348400 | H | 5.1567200  | -2.9851400 | -1.4776700 |
| H  | 0.3909500  | -2.6452500 | 1.7454200  | N | 1.9100300  | 0.2171400  | -0.5374200 |
| H  | 1.8927600  | -1.7884800 | 1.2694400  | N | -2.1716000 | 0.0678700  | -0.3379200 |
| C  | -2.4700700 | 1.3805300  | -0.1527400 | N | -3.8329500 | 1.5702500  | -0.0963500 |
| C  | -3.3859300 | -0.6038900 | -0.4017800 | N | 3.4789600  | 1.8176700  | -0.3215900 |
| C  | -4.4440600 | 0.3336300  | -0.2503400 | C | 0.1846700  | -0.4767000 | 1.6751700  |
| H  | -4.3027100 | 2.4610700  | 0.0178600  | H | 0.8101600  | 0.3946500  | 1.9516100  |
| C  | -3.6512000 | -1.9694800 | -0.5718000 | C | -1.1159000 | -0.4456500 | 2.4764900  |
| C  | -5.7863500 | -0.0593900 | -0.2670000 | H | -0.9139600 | -0.5237900 | 3.5616000  |
| C  | -4.9896000 | -2.3605900 | -0.5858900 | H | -1.6671800 | 0.4934200  | 2.3218400  |
| H  | -2.8202100 | -2.6667400 | -0.6984000 | H | -1.7789900 | -1.2804200 | 2.2004100  |
| C  | -6.0367500 | -1.4233200 | -0.4366400 |   |            |            |            |

**Table S62: Optimized XYZ coordinates for TS-22**

|    |            |            |            |   |            |            |            |
|----|------------|------------|------------|---|------------|------------|------------|
| C  | 0.9374200  | 2.3697500  | 0.6512200  | H | -5.0561000 | -3.2953700 | -1.5493100 |
| C  | 0.8741500  | 3.6824200  | 1.1390700  | H | -6.9528200 | -1.8184300 | -0.9581800 |
| C  | -0.3812200 | 4.2421700  | 1.4161700  | C | 2.0836300  | 1.5934200  | 0.2518600  |
| C  | -1.5508500 | 3.5036700  | 1.1886700  | C | 4.1273700  | 0.8601500  | -0.2826300 |
| C  | -1.4407200 | 2.1934000  | 0.7015200  | H | 3.8030000  | 2.8306400  | 0.5060200  |
| H  | 1.7842400  | 4.2664900  | 1.2893500  | C | 3.1559000  | -0.1361500 | -0.5751500 |
| H  | -0.4485500 | 5.2631200  | 1.7946900  | C | 5.4897800  | 0.6567500  | -0.5267400 |
| H  | -2.5301800 | 3.9478600  | 1.3771500  | C | 3.5335400  | -1.3568700 | -1.1483200 |
| N  | -0.2078200 | 1.6341300  | 0.4688600  | C | 5.8512500  | -0.5724700 | -1.0827100 |
| Ru | -0.0893400 | -0.2179000 | -0.3052000 | H | 6.2366400  | 1.4203000  | -0.3004900 |
| H  | 1.6376800  | -3.3668100 | 0.3320200  | C | 4.8903500  | -1.5609100 | -1.3930400 |
| C  | 1.7934800  | -3.3307300 | 1.4456500  | H | 2.7723100  | -2.0941500 | -1.4065400 |
| C  | 1.3889100  | -2.0245900 | 2.0935400  | H | 6.9047200  | -0.7709100 | -1.2902000 |
| O  | 2.2554600  | -4.2881400 | 2.0348700  | H | 5.2200900  | -2.5002700 | -1.8406100 |
| Cl | -0.2014100 | 0.6738400  | -2.5613900 | N | 1.9020300  | 0.3334800  | -0.2173300 |
| H  | 2.1677700  | -1.2857200 | 1.8295200  | N | -2.1299500 | 0.0309400  | -0.1203200 |
| H  | 1.4262800  | -2.1757500 | 3.1874100  | N | -3.8458400 | 1.3900400  | 0.3982100  |
| C  | -2.4757200 | 1.2542400  | 0.3520000  | N | 3.4188400  | 1.9315800  | 0.2387800  |
| C  | -3.3136200 | -0.6275000 | -0.4112900 | C | 0.0162900  | -1.4959600 | 1.6477300  |
| C  | -4.4085800 | 0.2187400  | -0.0845600 | H | -0.1581500 | -0.5401600 | 2.1590800  |
| H  | -4.3475600 | 2.2269800  | 0.6721600  | C | -1.1289400 | -2.4572400 | 1.9756800  |
| C  | -3.5286300 | -1.9044300 | -0.9448200 | H | -1.1274800 | -2.7118100 | 3.0507400  |
| C  | -5.7347400 | -0.1865300 | -0.2684400 | H | -2.1042800 | -2.0146900 | 1.7304900  |
| C  | -4.8495700 | -2.3086700 | -1.1304000 | H | -1.0494600 | -3.4068700 | 1.4193400  |
| H  | -2.6756200 | -2.5309800 | -1.2095500 | H | -0.0057500 | -1.7891500 | -0.9470200 |
| C  | -5.9326200 | -1.4647200 | -0.7955000 | H | 0.0488300  | -1.8082000 | 0.1719500  |
| H  | -6.5763900 | 0.4626000  | -0.0188100 |   |            |            |            |

**Table S17: Optimized XYZ coordinates for TS-23**

|    |            |            |            |   |            |            |            |
|----|------------|------------|------------|---|------------|------------|------------|
| C  | 0.9806700  | 2.5005700  | -0.1519900 | C | 4.1200100  | 0.6925900  | -0.3982800 |
| C  | 0.9889500  | 3.8973600  | -0.0742200 | H | 3.8317500  | 2.8024300  | -0.1645400 |
| C  | -0.2215900 | 4.5809700  | 0.0977100  | C | 3.1235500  | -0.3233400 | -0.4654700 |
| C  | -1.4222100 | 3.8622100  | 0.1652600  | C | 5.4885600  | 0.4041400  | -0.3992400 |
| C  | -1.3946000 | 2.4659900  | 0.0756000  | C | 3.5117800  | -1.6696100 | -0.5387200 |
| H  | 1.9273400  | 4.4484400  | -0.1614400 | C | 5.8495700  | -0.9424900 | -0.4672900 |
| H  | -0.2315400 | 5.6696600  | 0.1606200  | H | 6.2404400  | 1.1940100  | -0.3457300 |
| H  | -2.3746800 | 4.3851400  | 0.2726800  | C | 4.8754000  | -1.9616300 | -0.5368000 |
| N  | -0.1934000 | 1.7898300  | -0.0532700 | H | 2.7648200  | -2.4587400 | -0.6000600 |
| Ru | -0.2087600 | -0.1476500 | -0.2866900 | H | 6.9076900  | -1.2118200 | -0.4686400 |
| H  | 3.4948100  | -0.6102800 | 2.8192400  | H | 5.1974200  | -3.0033700 | -0.5927300 |
| C  | 2.4473500  | -0.2547700 | 2.6227700  | N | 1.8650800  | 0.2667500  | -0.4119100 |
| C  | 1.4515700  | -1.3683800 | 2.3958000  | N | -2.2042400 | 0.2144700  | -0.0429700 |
| O  | 2.1938300  | 0.9365900  | 2.6276400  | N | -3.8451900 | 1.7316400  | 0.1727600  |
| Cl | -0.4331500 | 0.1059200  | -2.6629600 | N | 3.4282600  | 1.8869100  | -0.3275000 |
| H  | 1.3900900  | -1.8906000 | 3.3758300  | C | 0.0617600  | -0.9412700 | 1.9140100  |
| H  | 1.9459000  | -2.1095800 | 1.7387500  | H | -0.0088900 | 0.1474000  | 2.0813000  |
| C  | -2.4858600 | 1.5319400  | 0.0764700  | C | -1.0910400 | -1.6197900 | 2.6711700  |
| C  | -3.4153100 | -0.4573200 | -0.0459400 | H | -1.0074100 | -1.4502300 | 3.7600300  |
| C  | -4.4645000 | 0.4922800  | 0.0932600  | H | -2.0626600 | -1.2270000 | 2.3396800  |
| H  | -4.3084400 | 2.6304700  | 0.2387600  | H | -1.1078600 | -2.7085000 | 2.4998100  |
| C  | -3.6853400 | -1.8275800 | -0.1591600 | H | -0.0713100 | -1.7290400 | 0.7710200  |
| C  | -5.8070600 | 0.1016200  | 0.1297800  | O | -0.5066400 | -2.3166300 | -0.2773900 |
| C  | -5.0241200 | -2.2141500 | -0.1224400 | C | 0.2513000  | -3.1622400 | -1.1343100 |
| H  | -2.8470800 | -2.5184300 | -0.2702000 | H | 1.0695600  | -2.6045600 | -1.6253000 |
| C  | -6.0642700 | -1.2673700 | 0.0199300  | H | -0.4198600 | -3.4788500 | -1.9539300 |
| H  | -6.6170500 | 0.8262000  | 0.2348800  | C | 0.7783800  | -4.3860500 | -0.3885200 |
| H  | -5.2803000 | -3.2719800 | -0.2099500 | H | 1.2979300  | -5.0763100 | -1.0736700 |
| H  | -7.0998300 | -1.6136900 | 0.0414400  | H | 1.4854700  | -4.0972000 | 0.4081200  |
| C  | 2.0859900  | 1.5989200  | -0.3194900 | H | -0.0519400 | -4.9301200 | 0.0875500  |

**Table S17: Optimized XYZ coordinates for TS-24**

|    |            |            |            |   |            |            |            |
|----|------------|------------|------------|---|------------|------------|------------|
| C  | 1.2038200  | -2.3804700 | -0.7429900 | H | -6.4062100 | -1.0925300 | 0.1500100  |
| C  | 1.2266600  | -3.6930200 | -1.2529400 | H | -5.1694900 | 2.7462100  | 1.7331100  |
| C  | 0.0097700  | -4.3313300 | -1.5102100 | H | -6.9503400 | 1.1246000  | 1.1595400  |
| C  | -1.2101600 | -3.6821800 | -1.2582600 | C | 2.2929900  | -1.5129700 | -0.3720800 |
| C  | -1.1750200 | -2.3778600 | -0.7422600 | C | 4.2828000  | -0.6401000 | 0.1529100  |
| H  | 2.1716600  | -4.2064000 | -1.4393500 | H | 4.0943900  | -2.6264500 | -0.6364200 |
| H  | 0.0070600  | -5.3475500 | -1.9082200 | C | 3.2467100  | 0.2859200  | 0.4543600  |
| H  | -2.1576100 | -4.1848500 | -1.4594400 | C | 5.6288100  | -0.3495700 | 0.4015600  |
| N  | 0.0125400  | -1.7575800 | -0.5104300 | C | 3.5431900  | 1.5233300  | 1.0400700  |
| Ru | 0.0223600  | 0.1473700  | 0.1982600  | C | 5.9080800  | 0.8938000  | 0.9721400  |
| H  | 1.3293200  | 2.3807300  | -0.6675400 | H | 6.4241500  | -1.0608800 | 0.1700700  |
| C  | 0.2611100  | 2.1052600  | -0.7917200 | C | 4.8830500  | 1.8130000  | 1.2910300  |
| C  | -0.6979300 | 3.2879900  | -0.7346600 | H | 2.7353200  | 2.2076600  | 1.3028400  |
| O  | -0.0070300 | 1.1572100  | -1.6656200 | H | 6.9458800  | 1.1584600  | 1.1850500  |
| Cl | -0.0233400 | -0.7055700 | 2.4692000  | H | 5.1496300  | 2.7662700  | 1.7514500  |
| H  | -0.0160400 | 1.6709500  | 0.8498100  | N | 2.0263600  | -0.2696700 | 0.1040600  |
| H  | -1.7221900 | 2.8956900  | -0.6439200 | N | -2.0168800 | -0.2575200 | 0.0887000  |
| H  | -0.4853500 | 3.9033000  | 0.1579200  | N | -3.6199000 | -1.7622800 | -0.3743400 |
| C  | -2.2697500 | -1.5030200 | -0.3715800 | N | 3.6495200  | -1.7557100 | -0.3701200 |
| C  | -3.2410100 | 0.2876600  | 0.4332800  | C | -0.5952900 | 4.1484900  | -2.0098200 |
| C  | -4.2689800 | -0.6491700 | 0.1362700  | H | -1.4074500 | 4.8954200  | -1.9922200 |
| H  | -4.0522300 | -2.6423100 | -0.6321000 | H | -0.7870000 | 3.4968800  | -2.8789500 |
| C  | -3.5502800 | 1.5210300  | 1.0219900  | C | 0.7507800  | 4.8634100  | -2.1777500 |
| C  | -5.6184100 | -0.3727400 | 0.3808800  | H | 0.7526800  | 5.5019600  | -3.0746500 |
| C  | -4.8931400 | 1.7969500  | 1.2700700  | H | 0.9711300  | 5.5063200  | -1.3092300 |
| H  | -2.7490600 | 2.2096700  | 1.2917900  | H | 1.5821000  | 4.1489200  | -2.2816100 |
| C  | -5.9099600 | 0.8689400  | 0.9483900  |   |            |            |            |

**Table S18: Optimized XYZ coordinates for 25**

|    |            |            |            |   |            |            |            |
|----|------------|------------|------------|---|------------|------------|------------|
| C  | -1.0234900 | 2.1352500  | 0.2536500  | H | 6.6324800  | 0.6127700  | -0.0678100 |
| C  | -1.0417600 | 3.5261100  | 0.1287200  | H | 5.3747800  | -3.5296900 | 0.1150400  |
| C  | 0.1616800  | 4.2311900  | -0.0139500 | H | 7.1652100  | -1.8250900 | -0.0134200 |
| C  | 1.3752900  | 3.5303900  | -0.0265900 | C | -2.1195500 | 1.2237900  | 0.3996400  |
| C  | 1.3825200  | 2.1391700  | 0.0979100  | C | -4.1066600 | 0.2287300  | 0.6353500  |
| H  | -1.9954900 | 4.0577200  | 0.1457400  | H | -3.9147400 | 2.3661900  | 0.5414100  |
| H  | 0.1536200  | 5.3166500  | -0.1144400 | C | -3.0725000 | -0.7468600 | 0.5848800  |
| H  | 2.3207200  | 4.0665200  | -0.1336100 | C | -5.4512000 | -0.1274400 | 0.7771800  |
| N  | 0.1819600  | 1.4310500  | 0.2207800  | C | -3.3721100 | -2.1117900 | 0.6845700  |
| Ru | 0.1960200  | -0.4893900 | 0.3285100  | C | -5.7336300 | -1.4928800 | 0.8708300  |
| H  | -1.7842600 | -1.8667300 | -1.6637000 | H | -6.2447000 | 0.6214000  | 0.8168400  |
| C  | -0.7934000 | -1.9460800 | -2.1560700 | C | -4.7130000 | -2.4679300 | 0.8274200  |
| C  | -0.7545000 | -1.0957900 | -3.4349600 | H | -2.5701300 | -2.8512800 | 0.6629800  |
| O  | 0.2704700  | -1.6074900 | -1.2857300 | H | -6.7714400 | -1.8127700 | 0.9843200  |
| Cl | 0.2879200  | -0.5207700 | 2.7290800  | H | -4.9822800 | -3.5224500 | 0.9122300  |
| H  | -0.6557800 | -3.0106600 | -2.4311600 | N | -1.8559300 | -0.1052600 | 0.4221200  |
| H  | 0.2680300  | -1.1694300 | -3.8422800 | N | 2.2309000  | -0.0967500 | 0.1551200  |
| H  | -1.4331100 | -1.5484500 | -4.1828200 | N | 3.8466400  | 1.4589800  | 0.0180100  |
| C  | 2.4904200  | 1.2313700  | 0.0972400  | N | -3.4707700 | 1.4556300  | 0.5152300  |
| C  | 3.4526100  | -0.7449700 | 0.1196000  | C | -1.1275200 | 0.3806600  | -3.2274100 |
| C  | 4.4872900  | 0.2281200  | 0.0382400  | H | -0.8062200 | 0.9615400  | -4.1091300 |
| H  | 4.2953400  | 2.3675300  | 0.0135000  | H | -0.5472400 | 0.7755500  | -2.3763000 |
| C  | 3.7550700  | -2.1120800 | 0.1443000  | C | -2.6256500 | 0.6098700  | -2.9952100 |
| C  | 5.8372900  | -0.1332400 | -0.0100900 | H | -3.0019000 | 0.0208300  | -2.1445500 |
| C  | 5.1010300  | -2.4729900 | 0.0957400  | H | -2.8418600 | 1.6697900  | -2.7853300 |
| H  | 2.9511100  | -2.8471800 | 0.1973800  | H | -3.2129300 | 0.3166100  | -3.8811100 |
| C  | 6.1230700  | -1.5007300 | 0.0214100  |   |            |            |            |

**Table S19: Optimized XYZ coordinates for TS-26**

|    |            |            |            |   |            |            |            |
|----|------------|------------|------------|---|------------|------------|------------|
| C  | 1.4587300  | 2.2270400  | 0.8192400  | H | -5.2153500 | -2.3209100 | -1.9304800 |
| C  | 1.5678400  | 3.4852600  | 1.4263000  | H | -6.9051700 | -0.6568600 | -1.2192500 |
| C  | 0.4017400  | 4.2055000  | 1.7184800  | C | 2.4922400  | 1.3155200  | 0.4020900  |
| C  | -0.8537300 | 3.6757500  | 1.3896100  | C | 4.4144500  | 0.2581500  | -0.0224600 |
| C  | -0.9225100 | 2.4147000  | 0.7829400  | H | 4.3699800  | 2.1896900  | 0.9156900  |
| H  | 2.5489800  | 3.9044600  | 1.6574900  | C | 3.3141200  | -0.5255600 | -0.4676800 |
| H  | 0.4720100  | 5.1872200  | 2.1887200  | C | 5.7364100  | -0.1748800 | -0.1689600 |
| H  | -1.7640100 | 4.2429500  | 1.5933100  | C | 3.5208200  | -1.7686800 | -1.0785300 |
| N  | 0.2223300  | 1.6939900  | 0.5296200  | C | 5.9254700  | -1.4180500 | -0.7767900 |
| Ru | 0.1050900  | -0.0413000 | -0.4065100 | H | 6.5816800  | 0.4262300  | 0.1720500  |
| H  | -1.9088600 | -2.0396200 | 1.0628400  | C | 4.8375500  | -2.2012800 | -1.2245900 |
| C  | -1.0760900 | -1.8857900 | 1.7777400  | H | 2.6662700  | -2.3527900 | -1.4229100 |
| C  | -0.8893900 | -3.1333100 | 2.6460300  | H | 6.9422100  | -1.7931600 | -0.9109200 |
| O  | 0.1411900  | -1.5981500 | 1.0956300  | H | 5.0372800  | -3.1648100 | -1.6974700 |
| Cl | 0.1744200  | 1.0845400  | -2.5238400 | N | 2.1397600  | 0.1514000  | -0.1913000 |
| H  | -1.3607500 | -1.0232000 | 2.4114700  | N | -1.8897100 | 0.4590000  | -0.2350800 |
| H  | -0.1233600 | -2.9141600 | 3.4093000  | N | -3.4115200 | 1.9908300  | 0.3883800  |
| H  | -1.8369700 | -3.3225300 | 3.1852000  | N | 3.8607600  | 1.4075300  | 0.5208400  |
| C  | -2.0728500 | 1.6738200  | 0.3344400  | C | -0.4737400 | -4.3837500 | 1.8554600  |
| C  | -3.1454700 | -0.0083400 | -0.5818300 | H | -0.2822900 | -5.2058600 | 2.5663400  |
| C  | -4.1213400 | 0.9478400  | -0.1875900 | H | 0.4869400  | -4.1731800 | 1.3566600  |
| H  | -3.8004300 | 2.8568800  | 0.7432900  | C | -1.5053100 | -4.8394700 | 0.8166200  |
| C  | -3.5229300 | -1.1974400 | -1.2185000 | H | -1.6545200 | -4.0823300 | 0.0302900  |
| C  | -5.4875700 | 0.7388700  | -0.4033300 | H | -1.1861000 | -5.7680000 | 0.3185100  |
| C  | -4.8841700 | -1.4069300 | -1.4338300 | H | -2.4869700 | -5.0294000 | 1.2824100  |
| H  | -2.7588400 | -1.9070700 | -1.5395600 | H | 0.0589700  | -1.8766500 | -0.1994400 |
| C  | -5.8485500 | -0.4560700 | -1.0305300 | H | -0.0069300 | -1.6604900 | -1.1782900 |
| H  | -6.2382200 | 1.4721000  | -0.1017500 |   |            |            |            |

**Table S21: Optimized XYZ coordinates for H<sub>2</sub>**

|   |           |           |            |
|---|-----------|-----------|------------|
| H | 0.0000000 | 0.0000000 | 0.3759500  |
| H | 0.0000000 | 0.0000000 | -0.3759500 |

**Table S22: Optimized XYZ coordinates for 6a**

|   |            |            |            |
|---|------------|------------|------------|
| C | 1.1716900  | -0.1508100 | 0.0000040  |
| H | 1.1574300  | -1.2481700 | -0.0005850 |
| H | 1.7165600  | 0.2233200  | 0.8835900  |
| H | 1.7169500  | 0.2241600  | -0.8829900 |
| C | -0.2327700 | 0.3986600  | -0.0000040 |
| H | -0.2944200 | 1.5223800  | -0.0000600 |
| O | -1.2412500 | -0.2761000 | 0.0000050  |

**Table S23: Optimized XYZ coordinates for 6**

|   |            |            |            |
|---|------------|------------|------------|
| C | 1.2208100  | -0.2243400 | 0.0000010  |
| H | 1.2814700  | -0.8670600 | -0.8911200 |
| H | 1.2814700  | -0.8670400 | 0.8911300  |
| H | 2.0847100  | 0.4581900  | -0.0000060 |
| C | -0.0844200 | 0.5531600  | 0.0000000  |
| H | -0.1308400 | 1.2082800  | 0.8947200  |
| H | -0.1308400 | 1.2082700  | -0.8947300 |
| O | -1.1525500 | -0.4015000 | 0.0000000  |
| H | -1.9838800 | 0.0984500  | 0.0000040  |

**Table S24: Optimized XYZ coordinates for 7a**

|   |            |            |            |
|---|------------|------------|------------|
| C | 0.0688200  | 0.6984000  | 0.0000700  |
| C | 1.5212100  | 0.4151800  | 0.0000230  |
| O | 2.0165300  | -0.7026500 | -0.0001000 |
| C | -0.8427100 | -0.2950000 | 0.0002410  |
| C | -2.3232000 | -0.1243000 | -0.0000880 |
| H | -2.7704300 | -0.6178600 | -0.8805700 |
| H | -2.7708600 | -0.6169400 | 0.8806900  |
| H | -2.6236500 | 0.9333600  | -0.0008020 |
| H | 2.1760300  | 1.3264400  | 0.0000000  |
| H | -0.4491000 | -1.3197700 | 0.0001800  |
| H | -0.2389800 | 1.7502700  | -0.0001750 |



**Table S25: Optimized XYZ coordinates for 7b**

|   |            |            |            |
|---|------------|------------|------------|
| C | -0.0970200 | 0.7463000  | -0.0000020 |
| H | 0.0861400  | 1.4025800  | 0.8745500  |
| H | 0.0860600  | 1.4027000  | -0.8745000 |
| C | -1.5698900 | 0.4070400  | -0.0000010 |
| H | -2.2554000 | 1.2993500  | -0.0000610 |
| O | -2.0212300 | -0.7208000 | 0.0000420  |
| C | 0.8375800  | -0.4629600 | -0.0000800 |
| H | 0.6072200  | -1.0896900 | 0.8769200  |
| H | 0.6073500  | -1.0894900 | -0.8772700 |
| C | 2.3169000  | -0.0681800 | 0.0000480  |
| H | 2.9675400  | -0.9557800 | -0.0000510 |
| H | 2.5728100  | 0.5319200  | -0.8885500 |
| H | 2.5727200  | 0.5316600  | 0.8888500  |

**Table S26: Optimized XYZ coordinates for 7**

|   |            |            |            |
|---|------------|------------|------------|
| C | -0.0087500 | 0.7229100  | -0.2045300 |
| H | 0.0225500  | 0.7443500  | -1.3082500 |
| C | -1.4599700 | 0.5169000  | 0.2389400  |
| H | -1.5210800 | 0.5516200  | 1.3473000  |
| O | -2.0406600 | -0.6881600 | -0.2715100 |
| C | 0.9523900  | -0.3545500 | 0.3128500  |
| H | 0.8979700  | -0.3907300 | 1.4168800  |
| C | 2.4026000  | -0.1305300 | -0.1255800 |
| H | 3.0682700  | -0.9218000 | 0.2519600  |
| H | 2.4853800  | -0.1186700 | -1.2243500 |
| H | 2.7848900  | 0.8343700  | 0.2452500  |
| H | -1.5862800 | -1.4265300 | 0.1643100  |
| H | -2.0905600 | 1.3323600  | -0.1477900 |
| H | 0.6175500  | -1.3439700 | -0.0492000 |
| H | 0.3289300  | 1.7159700  | 0.1458300  |

## References

1. Armarego, W. L. F.; Chai, C., Chapter 4 - Purification of Organic Chemicals. In *Purification of Laboratory Chemicals (Seventh Edition)*, Armarego, W. L. F.; Chai, C., Eds. Butterworth-Heinemann: Boston, 2013; pp 103-554.
2. Armarego, W. L. F.; Chai, C., Chapter 5 - Purification of Inorganic and Metal-Organic Chemicals. In *Purification of Laboratory Chemicals (Seventh Edition)*, Armarego, W. L. F.; Chai, C., Eds. Butterworth-Heinemann: Boston, 2013; pp 555-661.
3. Das, K.; Dutta, M.; Das, B.; Srivastava, H. K.; Kumar, A., *Adv. Synth. Catal.* **2019**, *361*, 2965-2980.
4. Das, K.; Nandi, P. G.; Islam, K.; Srivastava, H. K.; Kumar, A., *Eur. J. Org. Chem.* **2019**, *2019*, 6855-6866.
5. Das, K.; Yasmin, E.; Das, B.; Srivastava, H. K.; Kumar, A., *Catal. Sci. Technol.* **2020**, *10*, 8347-8358.
6. Dutta, M.; Das, K.; Prathapa, S. J.; Srivastava, H. K.; Kumar, A., *Chem. Commun.* **2020**, *56*, 9886-9889.
7. Davies, A. M.; Li, Z.-Y.; Stephenson, C. R. J.; Szymczak, N. K., *ACS Catal.* **2022**, *12*, 6729-6736.
8. Fu, S.; Shao, Z.; Wang, Y.; Liu, Q., *J. Am. Chem. Soc.* **2017**, *139*, 11941-11948.
9. Perdew, J. P.; Burke, K.; Ernzerhof, M., *Phys. Rev. Lett.* **1996**, *77*, 3865-3868.
10. Gaussian 16, R. C., M. J. Frisch, G. W. Trucks, H. B. Schlegel, G. E. Scuseria, M. A. Robb, J. R. Cheeseman, G. Scalmani, V. Barone, G. A. Petersson, H. Nakatsuji, X. Li, M. Caricato, A. V. Marenich, J. Bloino, B. G. Janesko, R. Gomperts, B. Mennucci, H. P. Hratchian, J. V. Ortiz, A. F. Izmaylov, J. L. Sonnenberg, D. Williams-Young, F. Ding, F. Lipparini, F. Egidi, J. Goings, B. Peng, A. Petrone, T. Henderson, D. Ranasinghe, V. G. Zakrzewski, J. Gao, N. Rega, G. Zheng, W. Liang, M. Hada, M. Ehara, K. Toyota, R. Fukuda, J. Hasegawa, M. Ishida, T. Nakajima, Y. Honda, O. Kitao, H. Nakai, T. Vreven, K. Throssell, J. A. Montgomery, Jr., J. E. Peralta, F. Ogliaro, M. J. Bearpark, J. J. Heyd, E. N. Brothers, K. N. Kudin, V. N. Staroverov, T. A. Keith, R. Kobayashi, J. Normand, K. Raghavachari, A. P. Rendell, J. C. Burant, S. S. Iyengar, J. Tomasi, M. Cossi, J. M. Millam, M. Klene, C. Adamo, R. Cammi, J. W. Ochterski, R. L. Martin, K. Morokuma, O. Farkas, J. B. Foresman, and D. J. Fox., *Gaussian inc., Wallingford CT 2016* **2016**, *2*, 4.
11. Hay, P. J.; Wadt, W. R., *J. Chem. Phys.* **1985**, *82*, 270-283.
12. Hay, P. J.; Wadt, W. R., *J. Chem. Phys.* **1985**, *82*, 299-310.
13. Wadt, W. R.; Hay, P. J., *J. Chem. Phys.* **1985**, *82*, 284-298.
